# Supplementary material for: Crystal engineering of a family of hybrid ultramicroporous materials based upon interpenetration and dichromate linkers
Source: Royal Society of Chemistry journal article supplement (doi:10.1039/c6sc01385f), 2016-01-01
Supplement: c6sc01385f1.pdf [file c6sc01385f1.pdf]

## Supporting Information

### **Crystal engineering of a family of hybrid ultramicroporous materials based upon interpenetration and dichromate linkers**

Hayley S. Scott,<sup>a</sup> Naoki Ogiwara,<sup>b</sup> Kai-Jie Chen,<sup>a</sup> David G. Madden,<sup>a</sup> Tony Pham,<sup>c</sup> Katherine Forrest,<sup>c</sup> Brian Space,<sup>c</sup> Satoshi Horike,<sup>b</sup> John J. Perry IV,<sup>a</sup> Susumu Kitagawa<sup>b,d\*</sup> and Michael J. Zaworotko<sup>\*,a</sup>

<sup>a</sup> Bernal Institute, Department of Chemical and Environmental Science, University of Limerick, Republic of Ireland

<sup>b</sup> Department of Synthetic Chemistry and Biological Chemistry, Kyoto University, Katsura, Nishikyo-ku, Kyoto, 615-8510, Japan

<sup>c</sup> Department of Chemistry, University of South Florida, 4202 East Fowler Avenue, Tampa, Florida, 33620, U.S.A

<sup>d</sup> Institute for Integrated Cell-Material Sciences (iCeMS), Kyoto University, Yoshida, Sakyo-ku, Kyoto 606-8501, Japan

## Table of Contents

|                                                                                        |    |
|----------------------------------------------------------------------------------------|----|
| General.....                                                                           | 3  |
| Syntheses.....                                                                         | 4  |
| Powder X-ray diffraction.....                                                          | 5  |
| Thermogravimetric analysis.....                                                        | 7  |
| Infrared spectroscopy.....                                                             | 8  |
| Single crystal diffraction data.....                                                   | 8  |
| Single component gas sorption isotherms.....                                           | 11 |
| Variable pressure PXRD.....                                                            | 14 |
| Calculation of isosteric heat of adsorption ( $Q_{st}$ ) towards CO <sub>2</sub> ..... | 15 |
| Molecular simulations.....                                                             | 21 |
| Stability testing of DICRO-3-Ni-i.....                                                 | 28 |
| TGA-Temperature Programmed Desorption (TPD) of DICRO-3-Ni-i.....                       | 30 |
| Dynamic Vapour Sorption (DVS).....                                                     | 36 |
| References.....                                                                        | 37 |

## General

All reagents and solvents were purchased from Sigma-Aldrich and used as received. Fourier Transform Infrared (FT-IR) spectra were measured on a Perkin Elmer Spectrum 100 spectrometer with Universal ATR accessory between the range of 4000-650  $\text{cm}^{-1}$ . Powder X-ray diffraction measurements were performed on a Rigaku RINT 2200 Ultima diffractometer with  $\text{Cu-K}_\alpha$  anode. Patterns were collected from  $3^\circ$  to  $40^\circ 2\theta$ , using a step size of  $0.02^\circ$  at a scan rate of  $0.1^\circ/\text{min}$ . Thermogravimetric analyses (TGA) were performed using a Rigaku TG8120, under flowing  $\text{N}_2$  between the temperature range 25-500  $^\circ\text{C}$  with  $10^\circ\text{C}/\text{min}$  ramp rate. Gas sorption isotherms were measured using BELSORP-mini equipment. Water sorption isotherms were measured using BELSORP-aqua equipment. X-ray crystallographic measurements for **DICRO-3-Cu-i** were collected at 100(2) K, under  $\text{N}_2$  flow, on a Bruker Quest D8 Mo Sealed Tube equipped with CMOS camera and Oxford cryosystem ( $\lambda = 0.71073 \text{ \AA}$ ). The data collection and integration were performed within SMART and SAINT+ software programs,<sup>1</sup> and corrected for absorption using the multi-scan method implemented in SADABS.<sup>2</sup> X-ray crystallographic measurements on **DICRO-3-Co-i**, **DICRO-3-Ni-i** and **DICRO-3-Zn-i** were performed at 150(2), 173(2) and 173(2) K, respectively under  $\text{N}_2$  flow, on a Rigaku AFC10 diffractometer with Rigaku Saturn Kappa CCD system equipped with a MicroMax-007 HF/VariMax rotating-anode X-ray generator with confocal monochromated  $\text{Mo-K}_\alpha$  radiation ( $\lambda = 0.71073 \text{ \AA}$ ). Data collection and integration were performed by CrystalClear 1.4.0, d\*TREK.<sup>3</sup> Crystallographic data and refinement parameters for all compounds, given in Table S1, were solved by direct methods (SHELXS-97), and refined (SHELXL-97) by full least-squares on all  $F^2$  data.<sup>4</sup> All non-hydrogen atoms were refined anisotropically and all framework hydrogen atoms were placed in calculated positions. Crystals of **DICRO-3-Co-i** were very small ( $0.03 \times 0.03 \times 0.03 \text{ mm}$ ) and weakly diffracting. As such, even after multiple collections on separate batches of sample, structural quality for this compound remains low. The overall structure, unit cell and space group of **DICRO-3-Co-i**, however, follows that of the three other compounds in the series. The contribution of the disordered solvent molecules was subtracted from the reflection data for all structures by the SQUEEZE method as implanted in the program PLATON.<sup>4b</sup>

## Syntheses

### Syntheses of single crystals:

#### **DICRO-3-Co-i**

$\text{Co}(\text{NO}_3)_2 \cdot 6\text{H}_2\text{O}$  (10 mg, 0.034 mmol), 4,4'-azopyridine (12.5 mg, 0.068 mmol) and  $\text{K}_2\text{Cr}_2\text{O}_7$  (10 mg, 0.034 mmol) were dissolved in 2 mL  $\text{H}_2\text{O}$  and placed in a 4 mL capacity vial that was then sealed. The vial and contents were heated to 120 °C for 48 h and cooled slowly to 30 °C over a 6 hour period. Upon cooling, small dark red-coloured crystals had formed on the sides of the vial. MW 697.36; Yield 9 mg (37%).

#### **DICRO-3-Cu-i**

$\text{Cu}(\text{NO}_3)_2 \cdot 3\text{H}_2\text{O}$  (13 mg, 0.05 mmol) and  $\text{K}_2\text{Cr}_2\text{O}_7$  (15 mg, 0.05 mmol) were dissolved in 2 mL  $\text{H}_2\text{O}$ . Separately, 4,4'-azopyridine (20 mg, 0.10 mmol) was dissolved in 2 mL MeCN. In a long, thin test tube the aqueous  $\text{Cu}^{2+}/\text{Cr}_2\text{O}_7^{2-}$  solution was placed. Carefully layered on top of that was a 2 mL solution of  $\text{H}_2\text{O}:\text{MeCN}$  (1:1/v:v). The MeCN ligand solution was then carefully layered upon the  $\text{H}_2\text{O}:\text{MeCN}$  layer and the test tube sealed and left to sit. Crystals of X-ray diffraction quality had formed after one week. MW 719.99; Yield 20 mg (55%).

#### **DICRO-3-Ni-i**

The synthesis for this compound follows that of **DICRO-3-Cu-i**, however  $\text{Ni}(\text{NO}_3)_2 \cdot 6\text{H}_2\text{O}$  (14 mg, 0.05 mmol) was used in place of  $\text{Cu}(\text{NO}_3)_2 \cdot 3\text{H}_2\text{O}$ . MW 715.14; Yield 11 mg (54%).

#### **DICRO-3-Zn-i**

The synthesis for this compound follows that of **DICRO-3-Cu-i**, however  $\text{Zn}(\text{NO}_3)_2 \cdot 6\text{H}_2\text{O}$  (14 mg, 0.05 mmol) was used in place of  $\text{Cu}(\text{NO}_3)_2 \cdot 3\text{H}_2\text{O}$ . MW 703.82; Yield 22 mg (62%).

### Syntheses of bulk powder products of DICRO-3-M-i:

$\text{K}_2\text{Cr}_2\text{O}_7$  (294 mg, 1.0 mmol) and  $\text{M}(\text{NO}_3)_2 \cdot x\text{H}_2\text{O}$  (1.0 mmol, ( $\text{Co}(\text{NO}_3)_2 \cdot 6\text{H}_2\text{O}$  = 291 mg,  $\text{Ni}(\text{NO}_3)_2 \cdot 6\text{H}_2\text{O}$  = 291 mg,  $\text{Cu}(\text{NO}_3)_2 \cdot 3\text{H}_2\text{O}$  = 241 mg,  $\text{Zn}(\text{NO}_3)_2 \cdot 6\text{H}_2\text{O}$  =

297 mg)) were dissolved in 20 mL of H<sub>2</sub>O and stirred at room temperature. Separately, 4,4'-azopyridine (368 mg, 2.0 mmol) was dissolved in 20 mL of MeCN. To the stirring aqueous solution of M(NO<sub>3</sub>)<sub>2</sub> and K<sub>2</sub>Cr<sub>2</sub>O<sub>7</sub>, the 4,4'-azopyridine solution in MeCN was added drop-wise, to form an immediate precipitate. The product was left stirring overnight, after which time it was removed from stirring and the mother liquor exchanged with fresh MeCN twice a day until the solution became clear.

For activation, **DICRO-3-Co-i** and **DICRO-3-Ni-i** were placed under reduced pressure (0.0030 mmHg) at heated to 100 °C for 12 h, while **DICRO-3-Cu-i** and **DICRO-3-Zn-i** were placed under reduced pressure (0.0030 mmHg) at ambient temperature for 12 h.

### **Powder X-ray diffraction data**

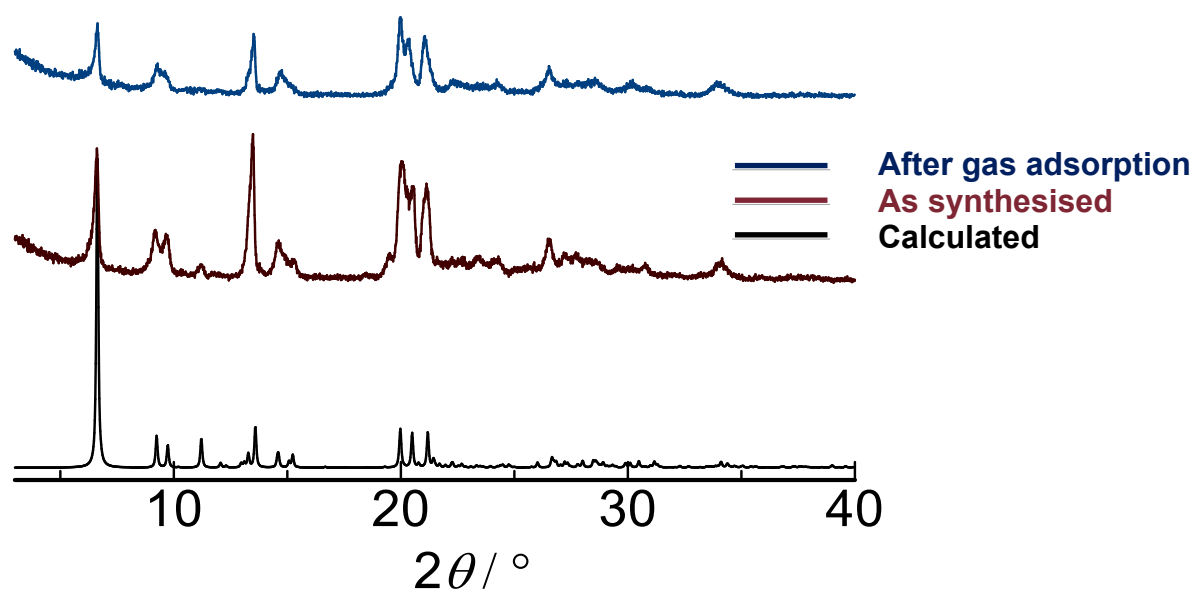

**Figure S1.** PXRD diffractograms of **DICRO-3-Co-i**.

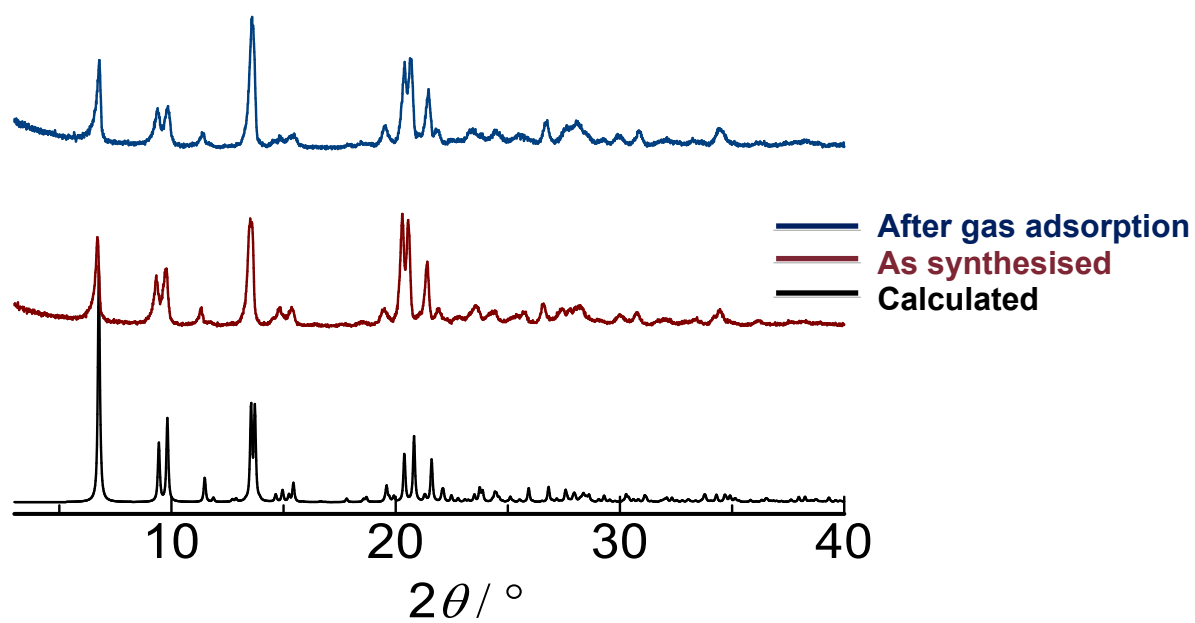



**Figure S2.** PXRD diffractograms of **DICRO-3-Ni-i**.

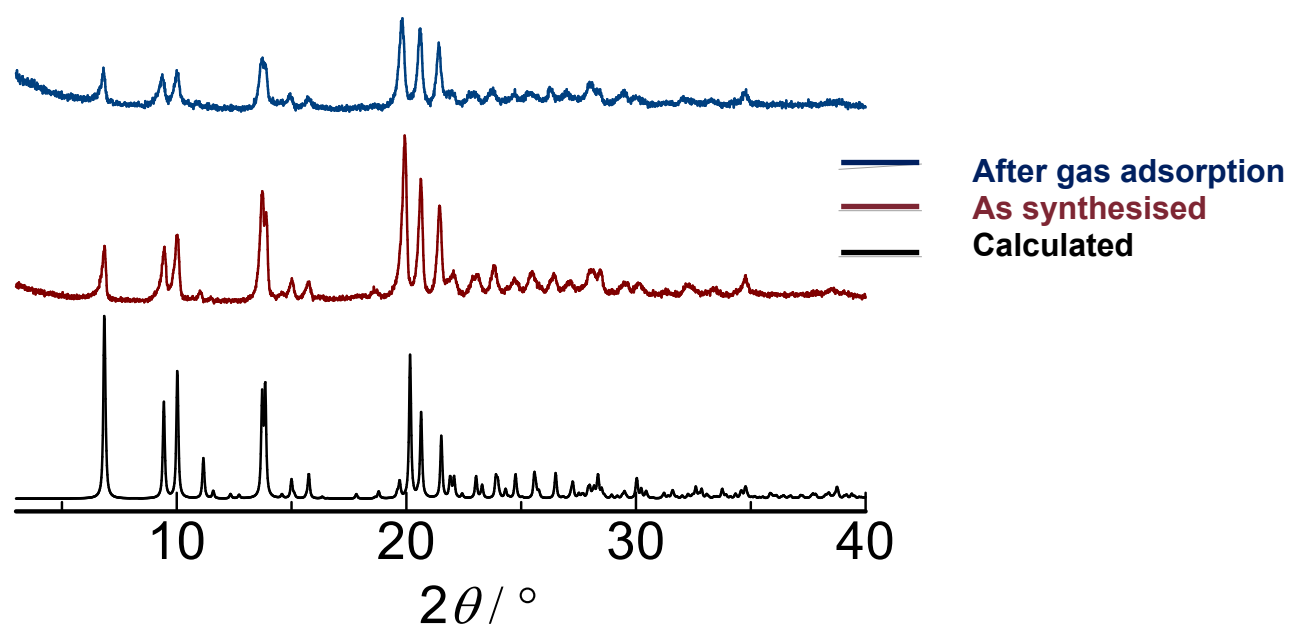

**Figure S3.** PXRD diffractograms of **DICRO-3-Cu-i**.

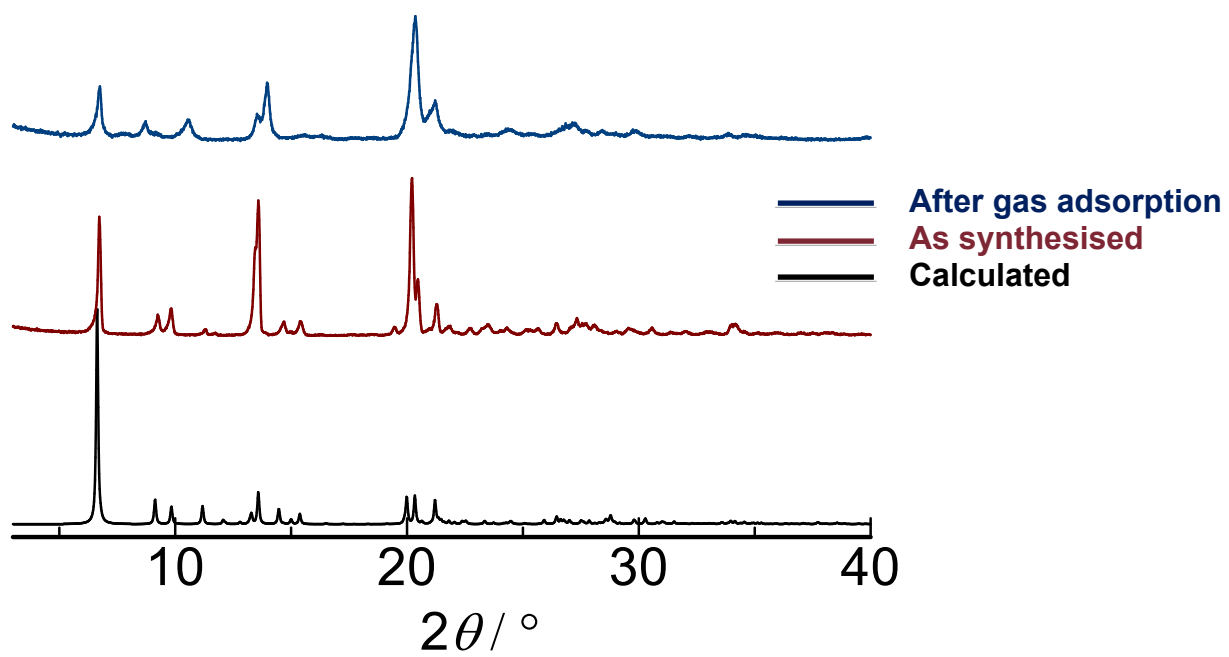

**Figure S4.** PXRD diffractograms of **DICRO-3-Zn-i**.

### Thermogravimetric analyses

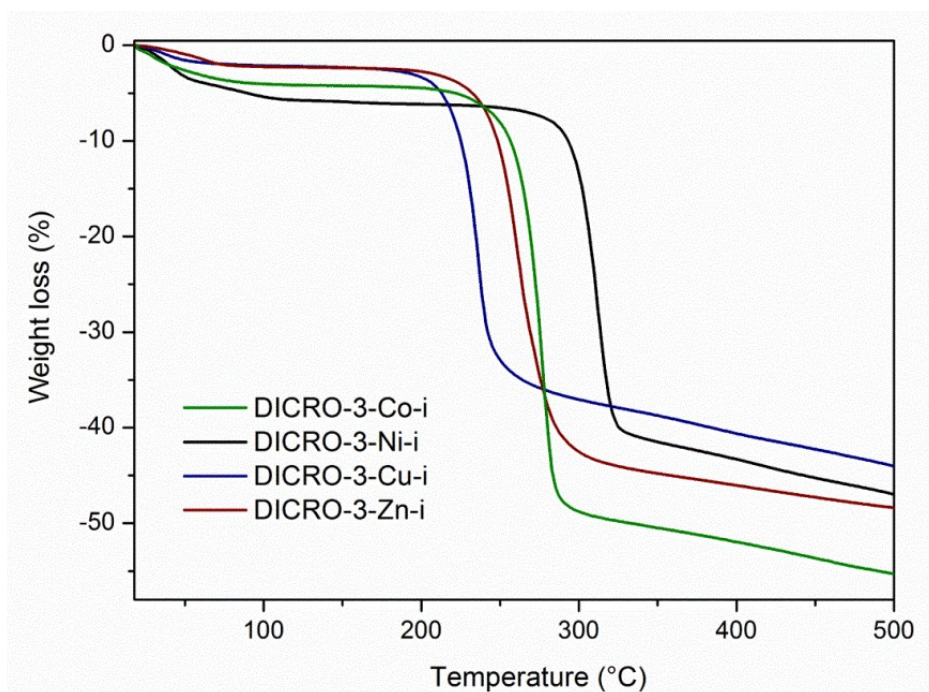

**Figure S5.** TGA measurements of **DICRO-3-M-i**.

### Infrared spectra

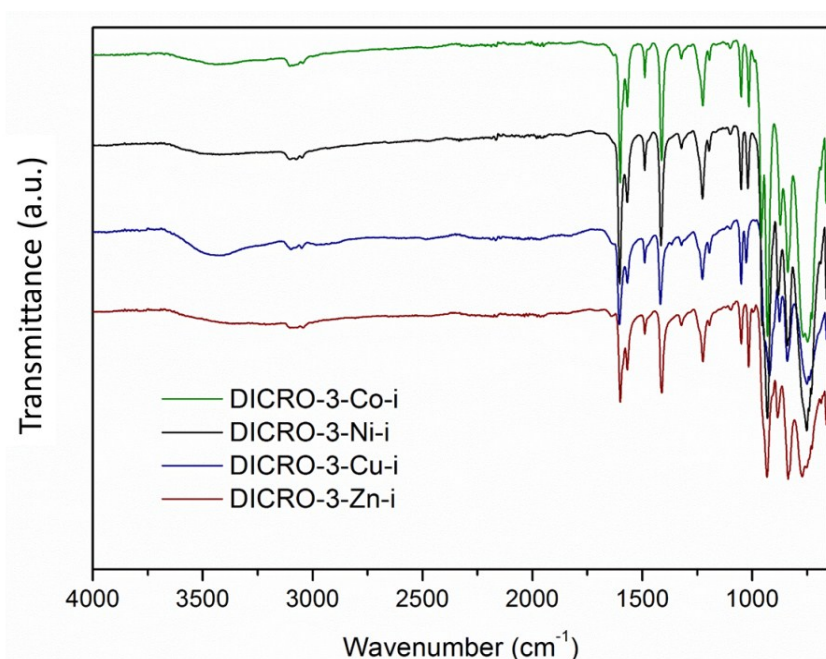

Figure S6. Infrared spectra of **DICRO-3-M-i**.

### Single crystal diffraction data

Table S1. Crystal data and refinement details.

| Compound                                                                    | DICRO-3-Co-i                                                                                  | DICRO-3-Ni-i                                                                                  | DICRO-3-Cu-i                                                                                  | DICRO-3-Zn-i                                                                                   |
|-----------------------------------------------------------------------------|-----------------------------------------------------------------------------------------------|-----------------------------------------------------------------------------------------------|-----------------------------------------------------------------------------------------------|------------------------------------------------------------------------------------------------|
| <b>Formula</b>                                                              | C <sub>20</sub> H <sub>16</sub> N <sub>8</sub> O <sub>7</sub> Cr <sub>2</sub> Co <sub>1</sub> | C <sub>20</sub> H <sub>16</sub> N <sub>8</sub> O <sub>7</sub> Cr <sub>2</sub> Ni <sub>1</sub> | C <sub>20</sub> H <sub>16</sub> N <sub>8</sub> O <sub>7</sub> Cr <sub>2</sub> Cu <sub>1</sub> | C <sub>20</sub> H <sub>16</sub> N <sub>8</sub> O <sub>10</sub> Cr <sub>2</sub> Zn <sub>1</sub> |
| <b>MW (g/mol)</b>                                                           | 643.34                                                                                        | 643.12                                                                                        | 647.95                                                                                        | 649.78                                                                                         |
| <b>T (K)</b>                                                                | 150                                                                                           | 173                                                                                           | 100                                                                                           | 173                                                                                            |
| <b>Crystal system</b>                                                       | Triclinic                                                                                     | Triclinic                                                                                     | Triclinic                                                                                     | Triclinic                                                                                      |
| <b>Space group</b>                                                          | <i>P</i> -1                                                                                   | <i>P</i> -1                                                                                   | <i>P</i> -1                                                                                   | <i>P</i> -1                                                                                    |
| <b>Z</b>                                                                    | 2                                                                                             | 2                                                                                             | 2                                                                                             | 2                                                                                              |
| <b>a (Å)</b>                                                                | 8.799(6)                                                                                      | 8.7338(17)                                                                                    | 8.9931(11)                                                                                    | 8.7822(18)                                                                                     |
| <b>b (Å)</b>                                                                | 13.246(9)                                                                                     | 13.153(3)                                                                                     | 13.0017(16)                                                                                   | 13.270(3)                                                                                      |
| <b>c (Å)</b>                                                                | 13.340(8)                                                                                     | 13.155(3)                                                                                     | 13.0138(16)                                                                                   | 13.278(3)                                                                                      |
| <b>α (°)</b>                                                                | 87.784(17)                                                                                    | 86.75(3)                                                                                      | 85.457(3)                                                                                     | 85.51(3)                                                                                       |
| <b>β (°)</b>                                                                | 89.283(14)                                                                                    | 84.55(3)                                                                                      | 79.543(3)                                                                                     | 80.23(3)                                                                                       |
| <b>γ (°)</b>                                                                | 79.794(18)                                                                                    | 80.39(3)                                                                                      | 83.613(3)                                                                                     | 83.94(3)                                                                                       |
| <b>V (Å<sup>3</sup>)</b>                                                    | 1528.1(17)                                                                                    | 1481.9(3)                                                                                     | 1484.4(3)                                                                                     | 1513.6(5)                                                                                      |
| <b>ρ<sub>calc</sub> (g/cm<sup>3</sup>)</b>                                  | 1.398                                                                                         | 1.441                                                                                         | 1.450                                                                                         | 1.426                                                                                          |
| <b>μ (mm<sup>-1</sup>)</b>                                                  | 1.282                                                                                         | 1.397                                                                                         | 1.477                                                                                         | 1.539                                                                                          |
| <b>Measured/independent Reflections (R<sub>int</sub>)</b>                   | 19295/6559(0.0918)                                                                            | 18023/6746(0.0370)                                                                            | 28759/6097(0.0813)                                                                            | 18101/6889(0.0261)                                                                             |
| <b>Observed reflections [I &gt; 2σ(I)]</b>                                  | 4927                                                                                          | 5763                                                                                          | 4004                                                                                          | 6171                                                                                           |
| <b>R<sub>1</sub><sup>a</sup>, wR<sub>2</sub><sup>b</sup> [I &gt; 2σ(I)]</b> | 0.1580, 0.3935                                                                                | 0.0612, 0.1537                                                                                | 0.0632, 0.1243                                                                                | 0.0425, 0.1086                                                                                 |
| <b>R<sub>1</sub>, wR<sub>2</sub> (all data)</b>                             | 0.1756, 0.4030                                                                                | 0.0716, 0.1614                                                                                | 0.1107, 0.1375                                                                                | 0.0471, 0.1121                                                                                 |
| <b>Goodness-of-fit on F<sup>2</sup></b>                                     | 1.586                                                                                         | 1.057                                                                                         | 1.018                                                                                         | 1.060                                                                                          |

Table S2. Selected bond lengths and angles for **DICRO-3-M-i** compounds.

|                    | DICRO-3-Co-i | DICRO-3-Ni-i | DICRO-3-Cu-i | DICRO-3-Zn-i |
|--------------------|--------------|--------------|--------------|--------------|
| <i>Lengths (Å)</i> |              |              |              |              |
| N(1)-M(1)          | 2.162(7)     | 2.108(3)     | 2.036(5)     | 2.160(3)     |
| N(4)-M(1)          | 2.151(8)     | 2.101(3)     | 2.048(5)     | 2.138(3)     |
| N(5)-M(1)          | 2.142(9)     | 2.068(4)     | 2.020(5)     | 2.161(2)     |
| N(8)-M(1)          | 2.195(10)    | 2.087(4)     | 2.019(5)     | 2.177(2)     |
| O(1)-M(1)          | 2.012(7)     | 2.046(3)     | 2.274(4)     | 2.088(2)     |
| O(7)-M(1)          | 2.026(7)     | 2.033(3)     | 2.342(4)     | 2.111(2)     |
| Cr(1)-O(1)         | 1.644(7)     | 1.628(3)     | 1.618(4)     | 1.635(2)     |
| Cr(1)-O(2)         | 1.603(10)    | 1.588(5)     | 1.603(4)     | 1.598(3)     |
| Cr(1)-O(3)         | 1.562(10)    | 1.592(5)     | 1.622(5)     | 1.609(3)     |
| Cr(1)-O(4)         | 1.767(7)     | 1.778(4)     | 1.784(5)     | 1.775(3)     |
| Cr(2)-O(4)         | 1.772(7)     | 1.778(4)     | 1.786(5)     | 1.782(3)     |
| Cr(2)-O(5)         | 1.597(9)     | 1.595(4)     | 1.601(6)     | 1.593(4)     |
| Cr(2)-O(6)         | 1.592(9)     | 1.611(4)     | 1.609(5)     | 1.587(4)     |
| Cr(2)-O(7)         | 1.627(7)     | 1.636(3)     | 1.615(4)     | 1.632(2)     |
| <i>Angles (°)</i>  |              |              |              |              |
| O(1)-M-O(7)        | 178.1(3)     | 177.78(13)   | 175.40(15)   | 178.24(10)   |
| O(1)-M-N(5)        | 90.0(3)      | 89.54(15)    | 93.60(17)    | 90.03(9)     |
| O(7)-M-N(5)        | 88.1(3)      | 88.56(14)    | 90.96(18)    | 89.38(10)    |
| O(1)-M-N(4)        | 88.5(3)      | 88.88(13)    | 90.20(17)    | 88.69(10)    |
| O(7)-M-N(4)        | 91.4(3)      | 90.02(13)    | 90.55(17)    | 89.68(11)    |
| N(5)-M-N(4)        | 92.0(3)      | 91.66(14)    | 87.56(19)    | 92.19(10)    |
| O(1)-M-N(1)        | 91.6(3)      | 91.77(13)    | 89.51(17)    | 91.67(11)    |
| O(7)-M-N(1)        | 88.6(3)      | 89.43(13)    | 89.91(17)    | 89.98(11)    |
| N(5)-M-N(1)        | 91.5(3)      | 91.27(14)    | 90.23(19)    | 89.48(10)    |
| N(4)-M-N(1)        | 176.5(3)     | 177.00(14)   | 177.76(19)   | 178.29(10)   |
| O(1)-M-N(8)        | 91.4(3)      | 90.18(15)    | 87.07(17)    | 89.41(9)     |
| O(7)-M-N(8)        | 90.5(3)      | 91.75(14)    | 88.38(18)    | 91.29(10)    |
| N(5)-M-N(8)        | 178.5(3)     | 178.65(13)   | 178.7(2)     | 175.94(10)   |
| N(4)-M-N(8)        | 88.6(3)      | 89.66(14)    | 91.34(19)    | 91.82(10)    |
| N(1)-M-N(8)        | 88.0(3)      | 87.42(14)    | 90.87(19)    | 86.52(10)    |
| M-O(1)-Cr(1)       | 154.9(5)     | 158.7(2)     | 167.0(2)     | 163.25(14)   |
| O(1)-Cr(1)-O(4)    | 109.2(4)     | 108.86(17)   | 108.8(2)     | 109.52(12)   |
| O(4)-Cr(2)-O(7)    | 110.1(4)     | 109.53(17)   | 107.6(2)     | 108.95(13)   |
| Cr(1)-O(4)-Cr(2)   | 135.6(5)     | 126.0(2)     | 127.3(3)     | 126.06(16)   |

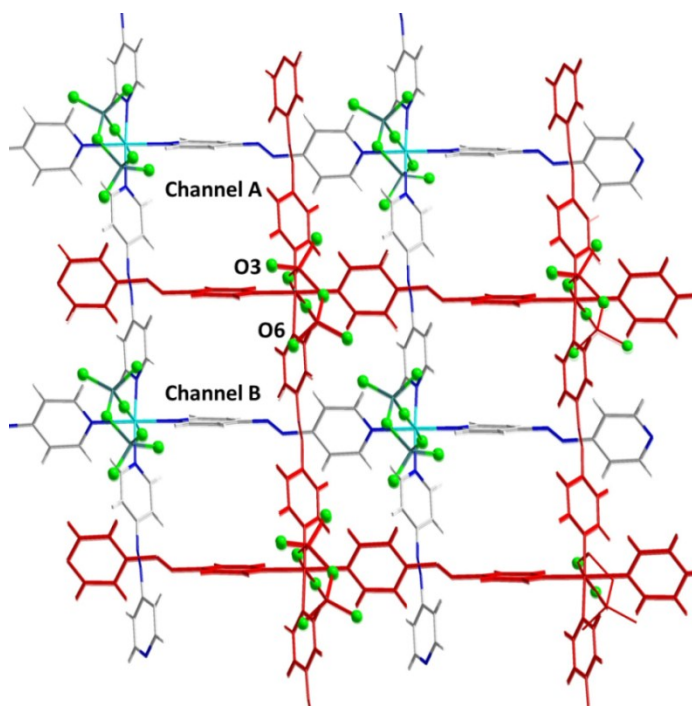

**Figure S7.** Packing diagram of **DICRO-3-M-i** compounds. Viewed down *a*-axis. One framework is presented red in colour, while the other framework is shown in default atom-based colours to highlight the contrast of the two frameworks. O-atoms are given in light-green in ball-and-stick representation. This view shows the formation of four distinct channels running through the structure.

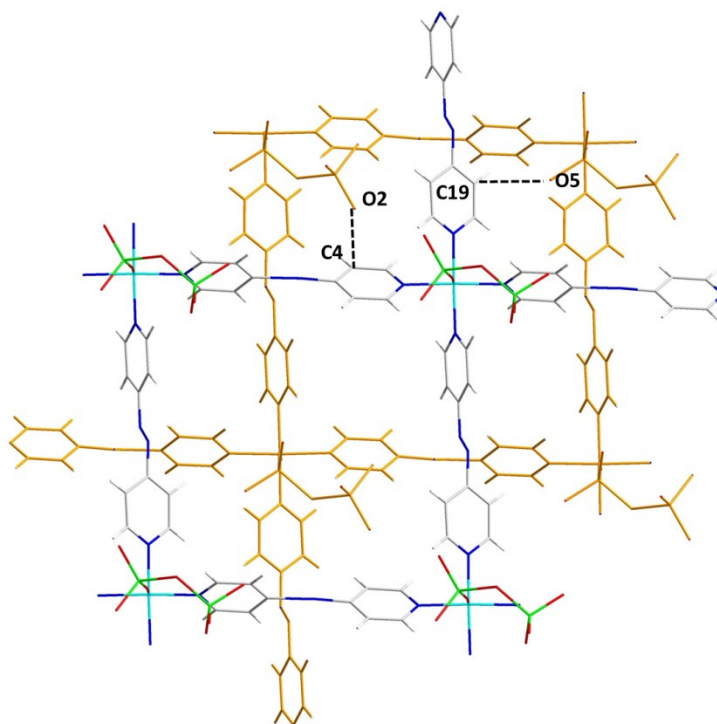

**Figure S8.** Example of C(H)⋯O close contacts in **DICRO-3-Cu-i**. Pyridyl groups of one net show C(H)⋯O contacts to **DICRO** pillar in second framework (C19(H19)⋯O5 = 3.10 Å and C4(H4)⋯O2 = 3.22 Å). View down *a*-axis.

### Single component gas sorption isotherms



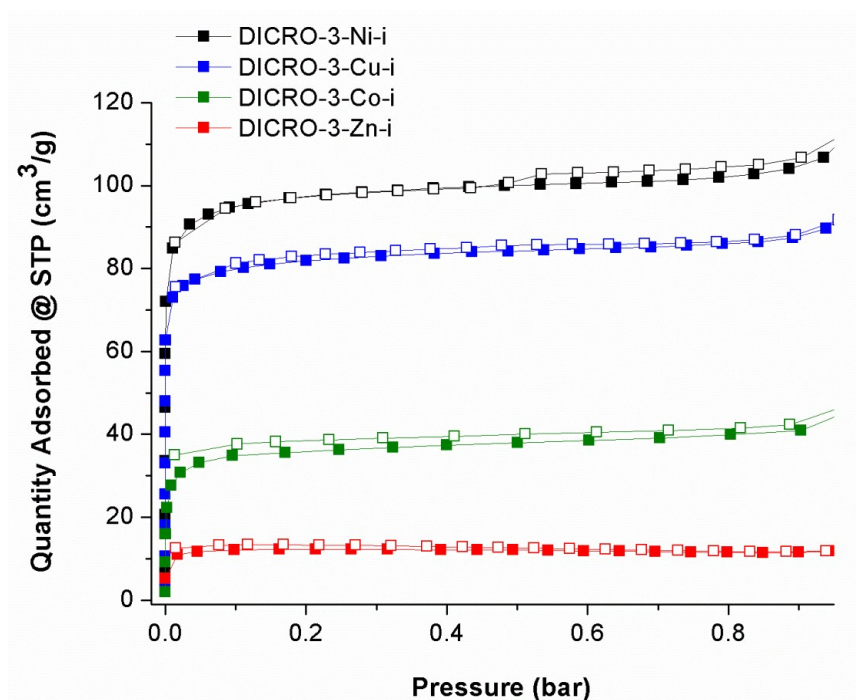

**Figure S9.** N<sub>2</sub> adsorption isotherms measured at 77 K. Closed symbols = adsorption, open symbols = desorption.

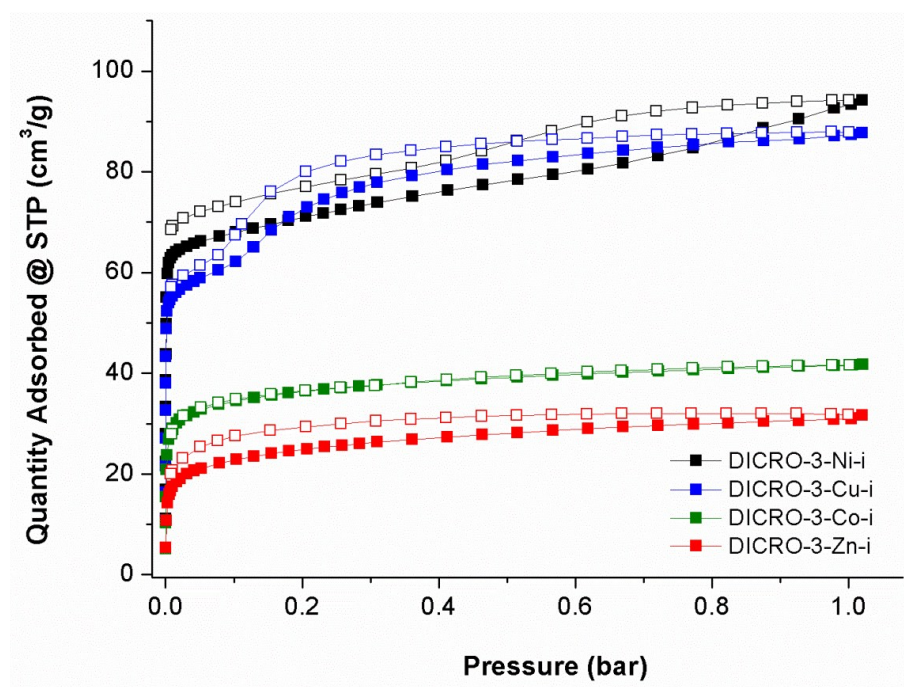

**Figure S10.** CO<sub>2</sub> adsorption isotherms measured at 195 K. Closed symbols = adsorption, open symbols = desorption.

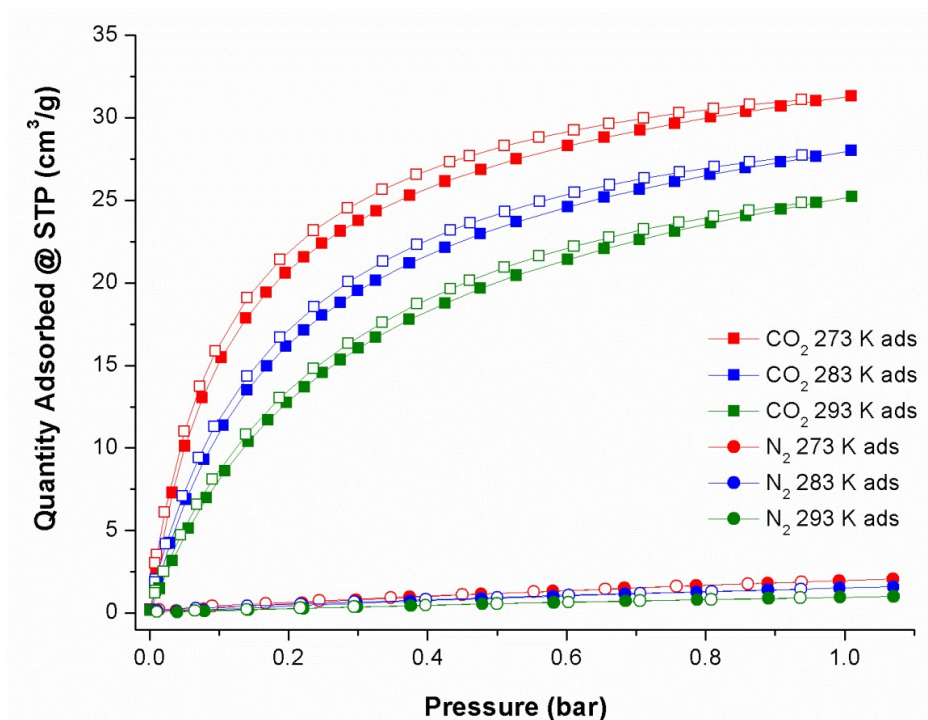

**Figure S11.** Single component gas sorption isotherms for **DICRO-3-Co-i**. Closed symbols = adsorption, open symbols = desorption.

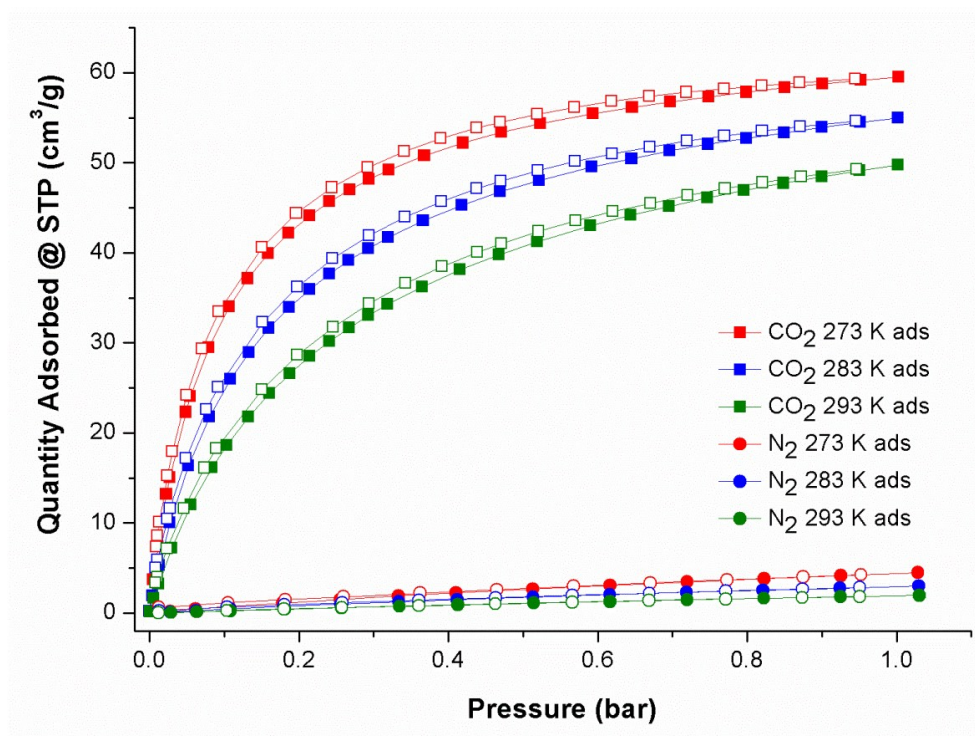

**Figure S12.** Single component gas sorption isotherms for **DICRO-3-Ni-i**. Closed symbols = adsorption, open symbols = desorption.

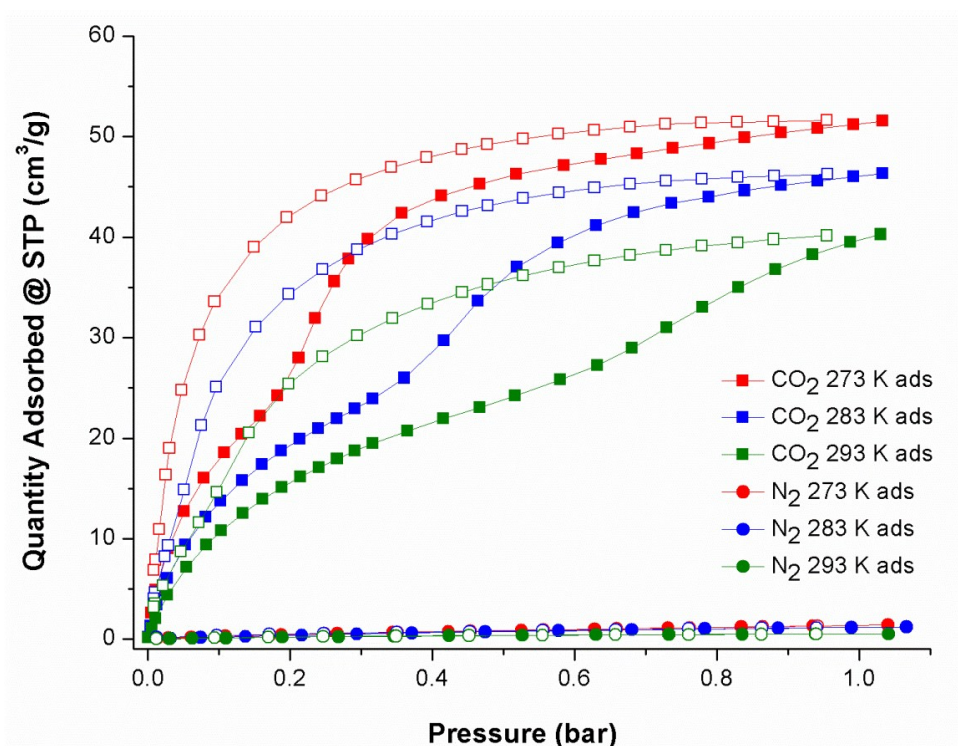

**Figure S13.** Single component gas sorption isotherms for **DICRO-3-Cu-i**. Closed symbols = adsorption, open symbols = desorption.

**Table S3.** Total gas uptake (cm<sup>3</sup>/g) for **DICRO-3-M-i** compounds.

|                       |       | <b>DICRO-3-Co-i</b> | <b>DICRO-3-Ni-i</b> | <b>DICRO-3-Cu-i</b> |
|-----------------------|-------|---------------------|---------------------|---------------------|
| <b>CO<sub>2</sub></b> | 195 K | 41.657              | 94.158              | 87.730              |
|                       | 273 K | 31.322              | 59.514              | 51.557              |
|                       | 283 K | 28.009              | 54.972              | 46.344              |
|                       | 293 K | 25.208              | 49.765              | 40.260              |
| <b>N<sub>2</sub></b>  | 77 K  | 69.157              | 184.29              | 142.76              |
|                       | 273 K | 2.0545              | 4.4761              | 1.4062              |
|                       | 283 K | 1.5905              | 2.9941              | 1.2120              |
|                       | 293 K | 1.0150              | 1.9503              | 0.51152             |

Preliminary selectivity values were calculated at 293 K from single component N<sub>2</sub> and CO<sub>2</sub> data. Langmuir curves were fitted to CO<sub>2</sub> isotherms and used to calculate uptake at pressure of 0.85 bar. Linear curves were fitted to N<sub>2</sub> data and uptake calculated at 0.15 bar.

## Variable pressure PXRD



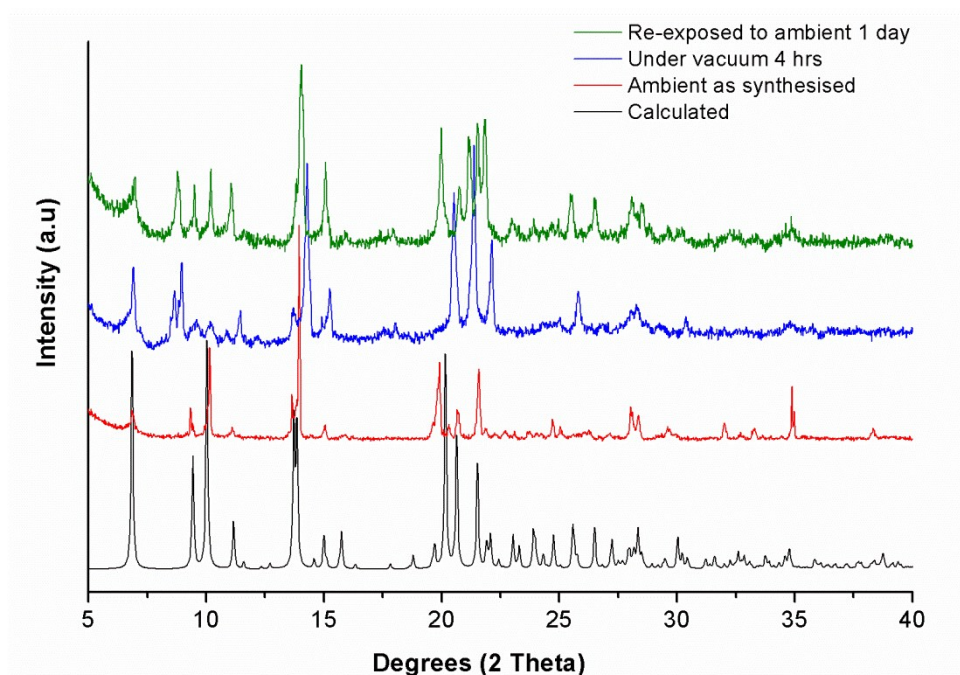

**Figure S14.** Variable pressure PXRD measurements on **DICRO-3-Cu-i**.

**Calculation of isosteric heat of adsorption ( $Q_{st}$ ) towards  $CO_2$**

The  $Q_{st}$  value for **DICRO-3-Co-i**, **DICRO-3-Ni-i** and **DICRO-3-Cu-i** were calculated according to the virial equation using the fitted adsorption isotherms at three temperatures (273, 283 and 293 K).

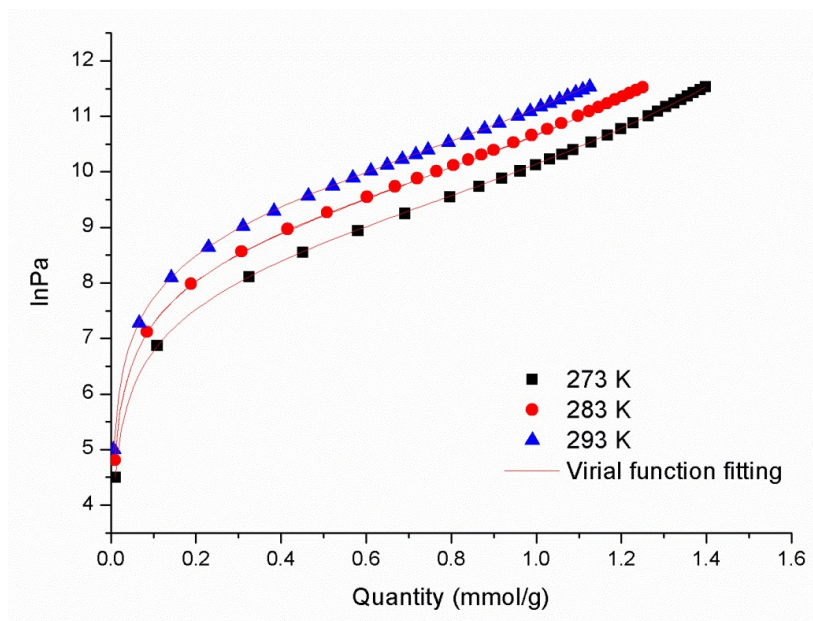

**Figure S15.** CO<sub>2</sub> adsorption isotherms of **DICRO-3-Co-i** at 273, 283 and 293 K fitted using the virial equation.

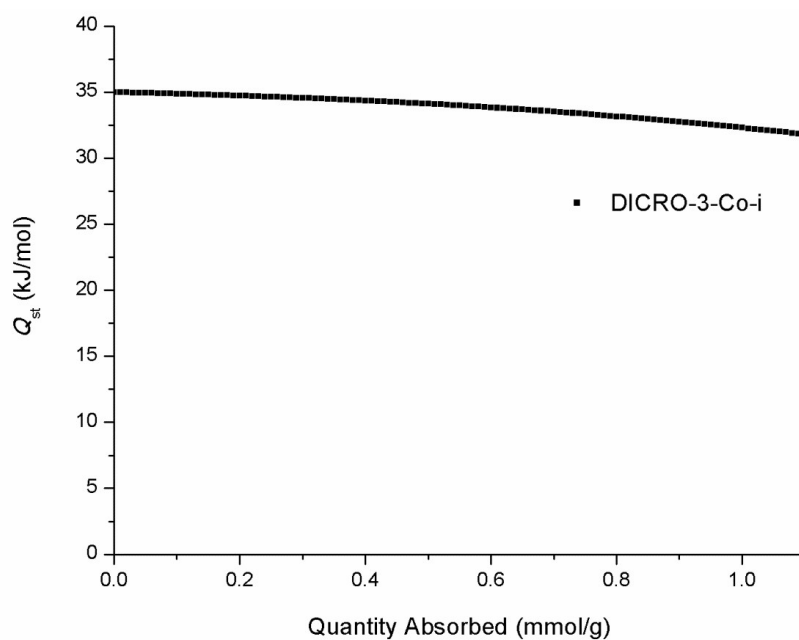

**Figure S16.** CO<sub>2</sub> isosteric heats of adsorption ( $Q_{st}$ ) of **DICRO-3-Co-i** using the fitted data measured at 273, 283 and 293 K.

**Table S4.** Parameters used to fit virial equation for **DICRO-3-Co-i**.

|               |                                                                                                                                |          |                |        |
|---------------|--------------------------------------------------------------------------------------------------------------------------------|----------|----------------|--------|
| Equation      | $y = \ln(x) + 1/T * (a_0 + a_1 * x + a_2 * x^2 + a_3 * x^3 + a_4 * x^4 + a_5 * x^5) + (b_0 + b_1 * x + b_2 * x^2 + b_3 * x^3)$ |          |                |        |
| Adj. R-Square |                                                                                                                                |          |                | 0.9995 |
|               |                                                                                                                                | Value    | Standard Error |        |
| A             | a0                                                                                                                             | -4209.34 | 39.81989       |        |
| A             | a1                                                                                                                             | 135.7521 | 51.53234       |        |
| A             | a2                                                                                                                             | 119.2436 | 149.48061      |        |
| A             | a3                                                                                                                             | 78.22709 | 156.74421      |        |
| A             | a4                                                                                                                             | -8.65499 | 54.21305       |        |
| A             | a5                                                                                                                             | 0        | 0              |        |
| A             | T                                                                                                                              | 273      | 0              |        |
| A             | b0                                                                                                                             | 24.39563 | 0.13957        |        |
| A             | b1                                                                                                                             | 0        | 0              |        |
| A             | b2                                                                                                                             | 0        | 0              |        |
| A             | b3                                                                                                                             | 0        | 0              |        |
| D             | a0                                                                                                                             | -4209.34 | 39.81989       |        |
| D             | a1                                                                                                                             | 135.7521 | 51.53234       |        |
| D             | a2                                                                                                                             | 119.2436 | 149.48061      |        |
| D             | a3                                                                                                                             | 78.22709 | 156.74421      |        |
| D             | a4                                                                                                                             | -8.65499 | 54.21305       |        |
| D             | a5                                                                                                                             | 0        | 0              |        |
| D             | T                                                                                                                              | 273      | 0              |        |
| D             | b0                                                                                                                             | 24.39563 | 0.13957        |        |
| D             | b1                                                                                                                             | 0        | 0              |        |
| D             | b2                                                                                                                             | 0        | 0              |        |
| D             | b3                                                                                                                             | 0        | 0              |        |
| F             | a0                                                                                                                             | -4209.34 | 39.81989       |        |
| F             | a1                                                                                                                             | 135.7521 | 51.53234       |        |
| F             | a2                                                                                                                             | 119.2436 | 149.48061      |        |
| F             | a3                                                                                                                             | 78.22709 | 156.74421      |        |
| F             | a4                                                                                                                             | -8.65499 | 54.21305       |        |
| F             | a5                                                                                                                             | 0        | 0              |        |
| F             | T                                                                                                                              | 273      | 0              |        |
| F             | b0                                                                                                                             | 24.39563 | 0.13957        |        |
| F             | b1                                                                                                                             | 0        | 0              |        |
| F             | b2                                                                                                                             | 0        | 0              |        |
| F             | b3                                                                                                                             | 0        | 0              |        |

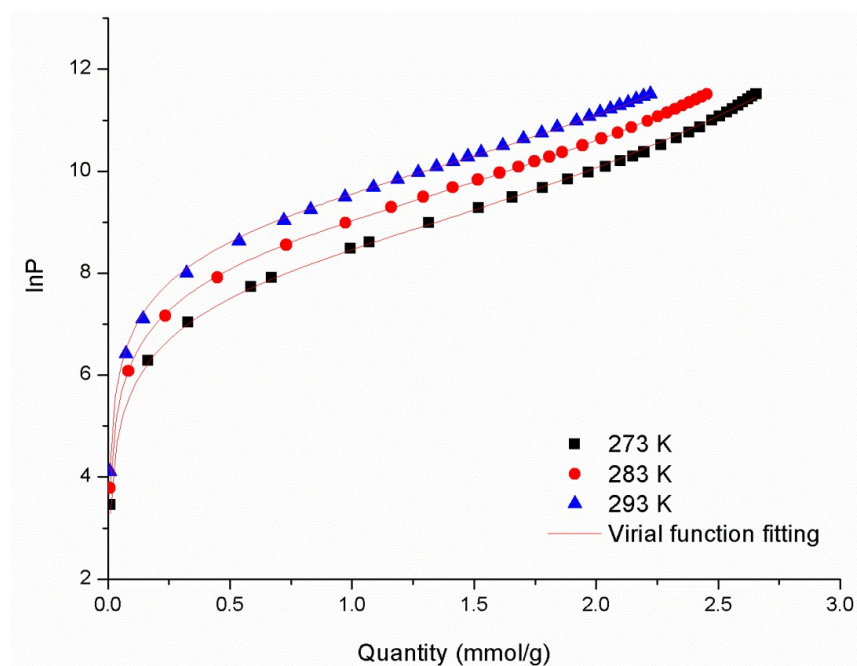

**Figure S17.** CO<sub>2</sub> adsorption isotherms of **DICRO-3-Ni-i** at 273, 283 and 293 K fitted using the virial equation.

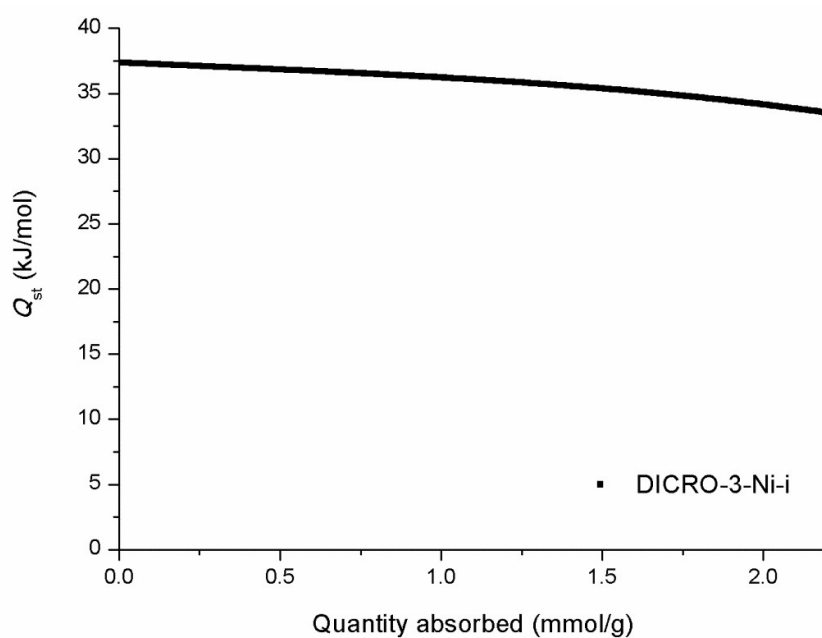

**Figure S18.** CO<sub>2</sub> isosteric heats of adsorption ( $Q_{st}$ ) of **DICRO-3-Ni-i** using the fitted data measured at 273, 283 and 293 K.

**Table S5.** Parameters used to fit virial equation for **DICRO-3-Co-i**.

| Equation      | $y = \ln(x) + 1/T * (a_0 + a_1 * x + a_2 * x^2 + a_3 * x^3 + a_4 * x^4 + a_5 * x^5) + (b_0 + b_1 * x + b_2 * x^2 + b_3 * x^3)$ |          |                |         |
|---------------|--------------------------------------------------------------------------------------------------------------------------------|----------|----------------|---------|
| Adj. R-Square |                                                                                                                                |          |                | 0.99945 |
|               |                                                                                                                                | Value    | Standard Error |         |
| A             | a0                                                                                                                             | -445.901 | 48.42964       |         |
| A             | a1                                                                                                                             | 133.9023 | 16.11047       |         |
| A             | a2                                                                                                                             | -22.0448 | 14.06697       |         |
| A             | a3                                                                                                                             | 25.99085 | 3.43025        |         |
| A             | a4                                                                                                                             | 0        | 0              |         |
| A             | a5                                                                                                                             | 0        | 0              |         |
| A             | T                                                                                                                              | 273      | 0              |         |
| A             | b0                                                                                                                             | 24.42811 | 0.16934        |         |
| A             | b1                                                                                                                             | 0        | 0              |         |
| A             | b2                                                                                                                             | 0        | 0              |         |
| A             | b3                                                                                                                             | 0        | 0              |         |
| D             | a0                                                                                                                             | -445.901 | 48.42964       |         |
| D             | a1                                                                                                                             | 133.9023 | 16.11047       |         |
| D             | a2                                                                                                                             | -22.0448 | 14.06697       |         |
| D             | a3                                                                                                                             | 25.99085 | 3.43025        |         |
| D             | a4                                                                                                                             | 0        | 0              |         |
| D             | a5                                                                                                                             | 0        | 0              |         |
| D             | T                                                                                                                              | 273      | 0              |         |
| D             | b0                                                                                                                             | 24.42811 | 0.16934        |         |
| D             | b1                                                                                                                             | 0        | 0              |         |
| D             | b2                                                                                                                             | 0        | 0              |         |
| D             | b3                                                                                                                             | 0        | 0              |         |
| F             | a0                                                                                                                             | -445.901 | 48.42964       |         |
| F             | a1                                                                                                                             | 133.9023 | 16.11047       |         |
| F             | a2                                                                                                                             | -22.0448 | 14.06697       |         |
| F             | a3                                                                                                                             | 25.99085 | 3.43025        |         |
| F             | a4                                                                                                                             | 0        | 0              |         |
| F             | a5                                                                                                                             | 0        | 0              |         |
| F             | T                                                                                                                              | 273      | 0              |         |
| F             | b0                                                                                                                             | 24.42811 | 0.16934        |         |
| F             | b1                                                                                                                             | 0        | 0              |         |
| F             | b2                                                                                                                             | 0        | 0              |         |
| F             | b3                                                                                                                             | 0        | 0              |         |



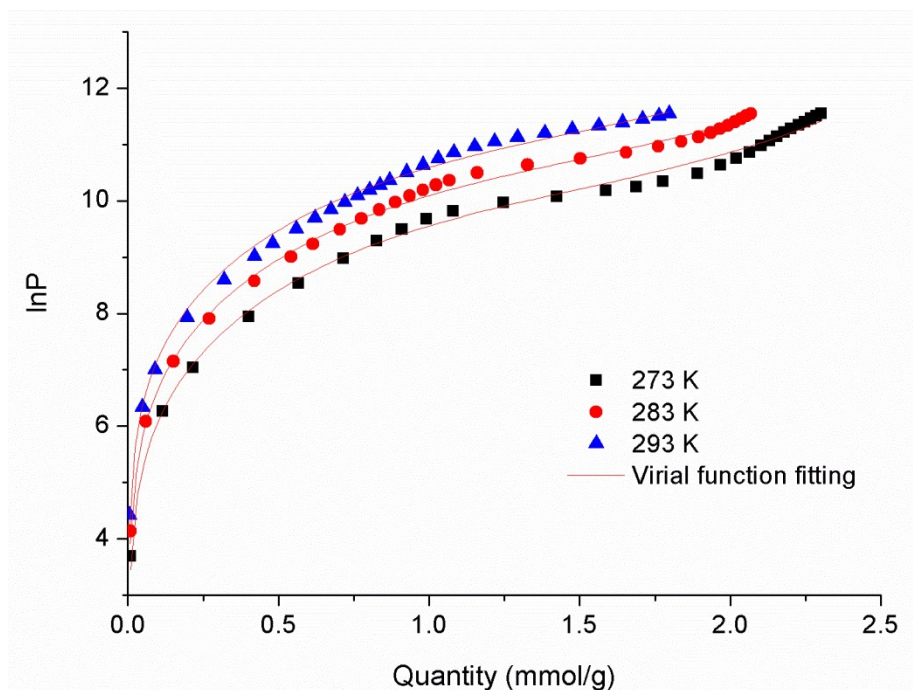

**Figure 19** CO<sub>2</sub> adsorption isotherms of **DICRO-3-Cu-i** at 273, 283 and 293 K fitted using the virial equation.

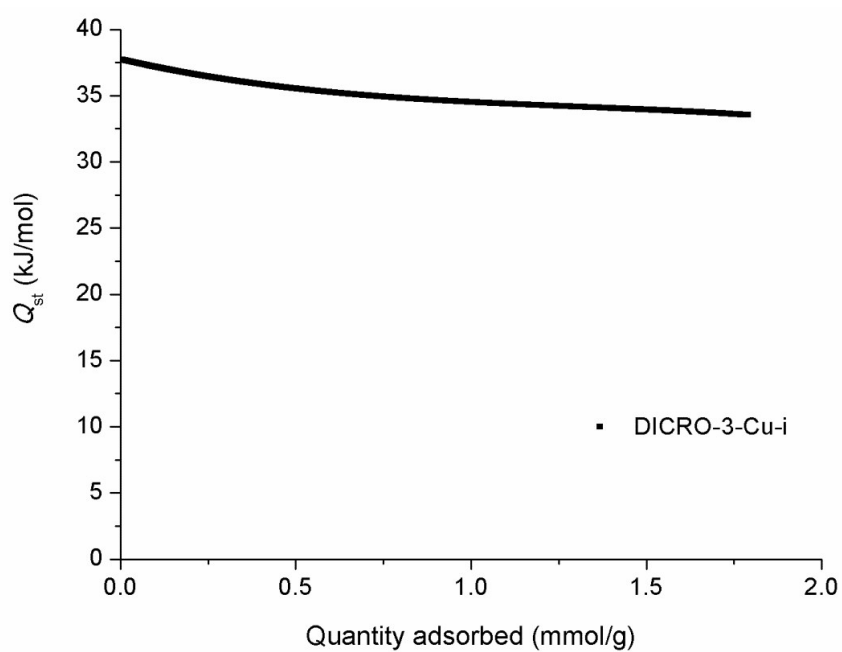

**Figure S20.** CO<sub>2</sub> isosteric heats of adsorption ( $Q_{st}$ ) of **DICRO-3-Cu-i** using the fitted data measured at 273, 283 and 293 K.

**Table S6.** Parameters used to fit virial equation for **DICRO-3-Cu-i**.

| Equation      | y =<br>ln(x)+1/T*(a0+a1*x+a2*x^2+a3*x^3+a4*x^4+a5*x^5)<br>+(b0+b1*x+b2*x^2+b3*x^3) |          |                |         |
|---------------|------------------------------------------------------------------------------------|----------|----------------|---------|
| Adj. R-Square |                                                                                    |          |                | 0.99573 |
|               |                                                                                    | Value    | Standard Error |         |
| A             | T                                                                                  | 273      | 0              |         |
| A             | a0                                                                                 | -4540.24 | 135.4086       |         |
| A             | a1                                                                                 | 730.9366 | 44.99256       |         |
| A             | a2                                                                                 | -457.815 | 47.15087       |         |
| A             | a3                                                                                 | 115.7841 | 13.7946        |         |
| A             | a4                                                                                 | 0        | 0              |         |
| A             | a5                                                                                 | 0        | 0              |         |
| A             | b0                                                                                 | 24.75861 | 0.47405        |         |
| A             | b1                                                                                 | 0        | 0              |         |
| A             | b2                                                                                 | 0        | 0              |         |
| A             | b3                                                                                 | 0        | 0              |         |
| C             | T                                                                                  | 283      | 0              |         |
| C             | a0                                                                                 | -4540.24 | 135.4086       |         |
| C             | a1                                                                                 | 730.9366 | 44.99256       |         |
| C             | a2                                                                                 | -457.815 | 47.15087       |         |
| C             | a3                                                                                 | 115.7841 | 13.7946        |         |
| C             | a4                                                                                 | 0        | 0              |         |
| C             | a5                                                                                 | 0        | 0              |         |
| C             | b0                                                                                 | 24.75861 | 0.47405        |         |
| C             | b1                                                                                 | 0        | 0              |         |
| C             | b2                                                                                 | 0        | 0              |         |
| C             | b3                                                                                 | 0        | 0              |         |
| E             | T                                                                                  | 293      | 0              |         |
| E             | a0                                                                                 | -4540.24 | 135.4086       |         |
| E             | a1                                                                                 | 730.9366 | 44.99256       |         |
| E             | a2                                                                                 | -457.815 | 47.15087       |         |
| E             | a3                                                                                 | 115.7841 | 13.7946        |         |
| E             | a4                                                                                 | 0        | 0              |         |
| E             | a5                                                                                 | 0        | 0              |         |
| E             | b0                                                                                 | 24.75861 | 0.47405        |         |
| E             | b1                                                                                 | 0        | 0              |         |
| E             | b2                                                                                 | 0        | 0              |         |
| E             | b3                                                                                 | 0        | 0              |         |

## Molecular simulations

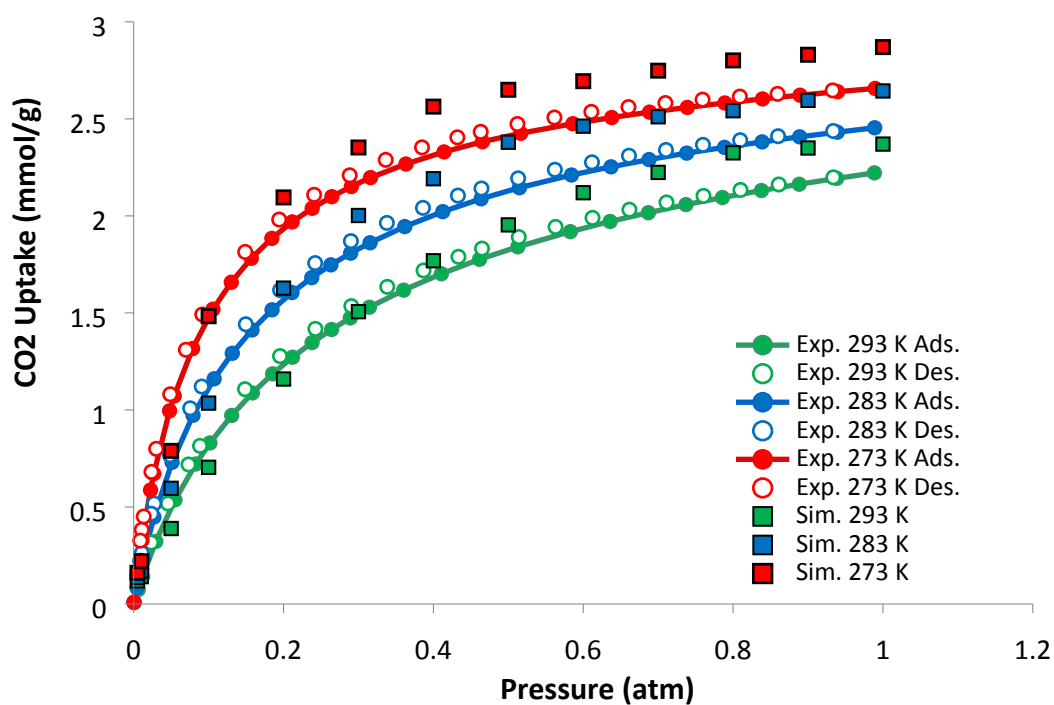

**Figure S21.** Experimental (lines with circles) and simulated (squares) CO<sub>2</sub> adsorption isotherms in DICRO-3-Ni-i at 273 (red), 283 (blue), and 293 K (green).

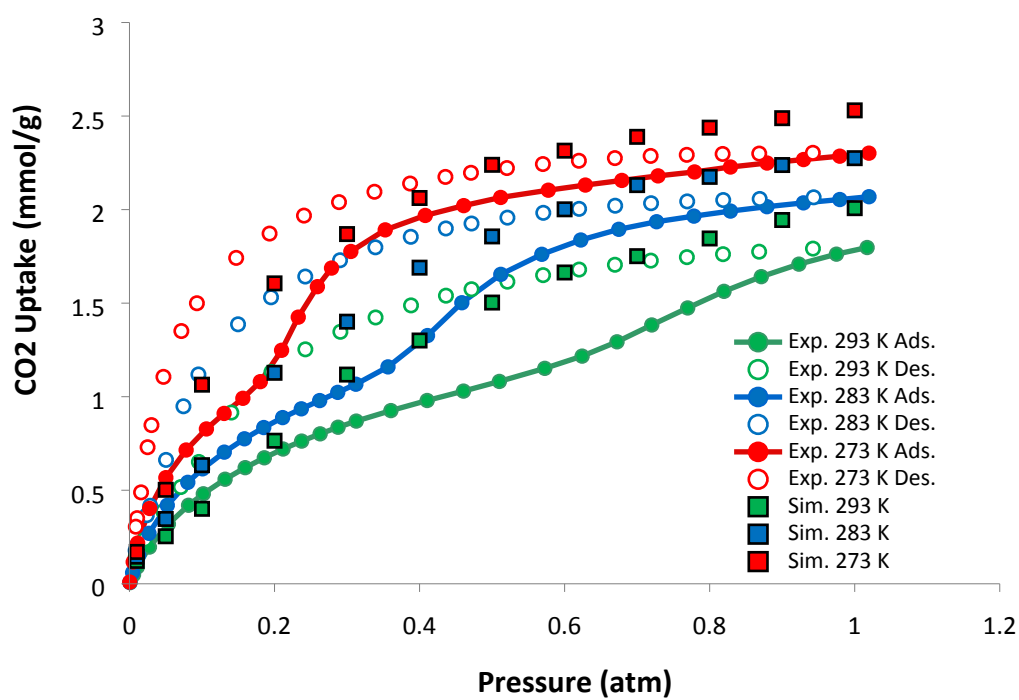

**Figure S22.** Experimental (lines with circles) and simulated (squares) CO<sub>2</sub> adsorption isotherms in DICRO-3-Cu-i at 273 (red), 283 (blue), and 293 K (green).

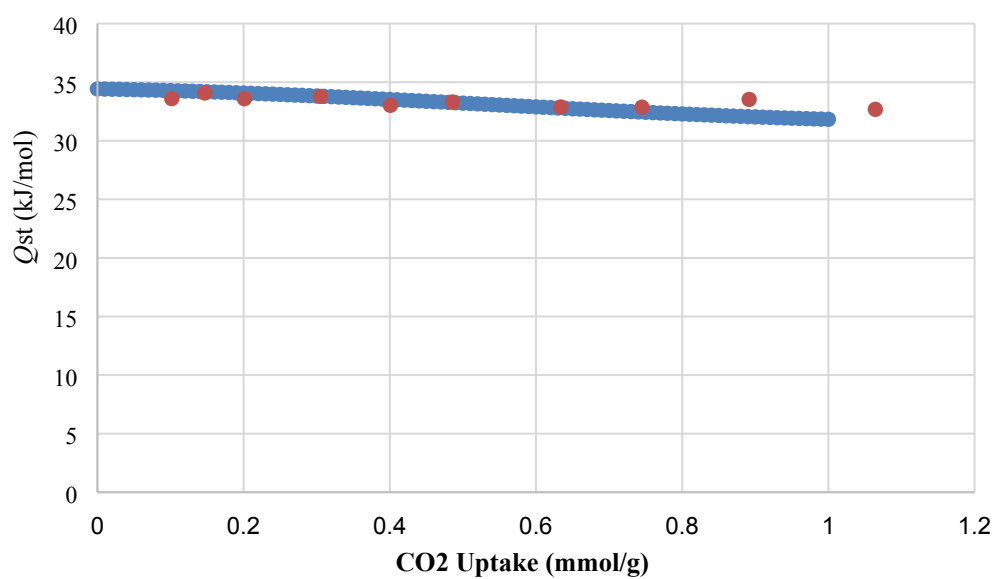

**Figure S23.** Experimental (blue line) and calculated (red dots)  $Q_{st}$  towards  $\text{CO}_2$  **DICRO-3-Cu-i**.

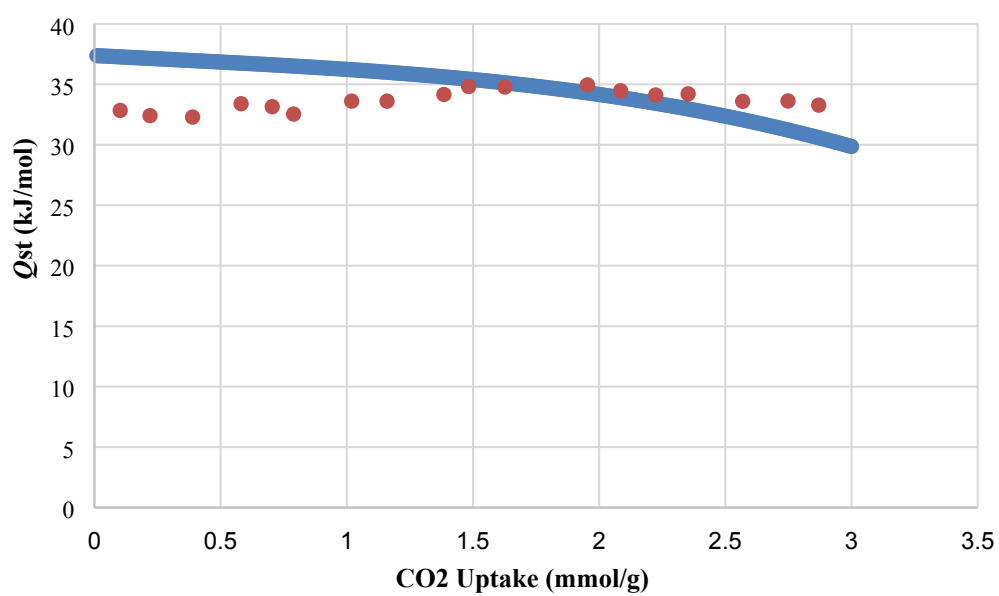

**Figure S24.** Experimental (blue line) and calculated (red dots)  $Q_{st}$  towards  $\text{CO}_2$  **for DICRO-3-Ni-i**.

## Modeling Details

Simulations of CO<sub>2</sub> adsorption were performed on **DICRO-3-Co-i**, **DICRO-3-Ni-i**, and **DICRO-3-Cu-i** using grand canonical Monte Carlo (GCMC) methods<sup>5</sup> in a  $2 \times 2 \times 2$  system cell of the respective MOMs. The single X-ray crystallographic structures that were obtained for all three MOMs herein were used for the parametrisations and simulations. A spherical cut-off distance corresponding to half the shortest system cell dimension length was used for the simulations in all three MOMs. A five-site polarisable potential that was developed previously for CO<sub>2</sub> was used for the simulations in this work.<sup>6</sup> The total potential energy of the MOM–CO<sub>2</sub> system was calculated through the sum of the repulsion/dispersion, electrostatic, and polarisation energies. These were calculated using the Lennard-Jones potential, partial charges with Ewald summation,<sup>7</sup> and a Thole-Applequist type model,<sup>8</sup> respectively. The chemical potential for CO<sub>2</sub> was determined for a range of temperatures through the Peng-Robinson equation of state.<sup>9</sup> All MOM atoms were held fixed throughout the simulations. All simulations were performed using the Massively Parallel Monte Carlo (MPMC) code.<sup>10</sup> For all state points considered, the simulations consisted of  $2.5 \times 10^6$  Monte Carlo steps to guarantee equilibration, followed by an additional  $2.5 \times 10^6$  steps to sample the desired thermodynamic properties.

For all three MOMs, the Lennard-Jones parameters ( $\epsilon$  and  $\sigma$ ) for all aromatic C, H, and N atoms were taken from the Optimised Potentials For Liquid Simulations – All Atom (OPLS-AA) force field,<sup>11</sup> while such parameters for Ni, Cr, and O were taken from the Universal Force Field (UFF).<sup>12</sup> The partial charges for the chemically distinct atoms in all three **DICRO-3-M-i** variants (Figure S25) were determined through electronic structure calculations on a variety of gas phase fragments that were extracted from the crystal structure of the respective MOMs. For these calculations, all light atoms (C, H, N, and O) and many-electron metal ions (Ni<sup>2+</sup> and Cr<sup>6+</sup>) were treated with the 6-31G\* and LANL2DZ ECP basis sets,<sup>13</sup> respectively. The NWChem *ab initio* software<sup>14</sup> was used to calculate the electrostatic potential surface for each fragment and the partial charges were subsequently fitted onto the atomic positions of the fragments using the CHELPG method.<sup>15</sup> For each chemically distinct atom, the partial charges were averaged between the fragments. The final partial charges for each chemically distinct atom in **DICRO-3-Co-i**, **DICRO-3-Ni-i**, and **DICRO-3-Cu-i** are provided in Table S7. Note, the crystallographic distances between various chemically distinct atoms for all three MOMs are provided in Table S8. The exponential damping-type atomic point polarisabilities for all C, H, N, and O atoms were taken from a carefully parametrised set provided by the work of van Duijnen and Swart (C = 1.28860 Å<sup>3</sup>, H = 0.41380 Å<sup>3</sup>, N = 0.97157 Å<sup>3</sup>, O = 0.85200 Å<sup>3</sup>).<sup>16</sup> The polarisability parameters for Ni<sup>2+</sup> and Cr<sup>6+</sup> were determined in previous work (Ni<sup>2+</sup> = 2.94650 Å<sup>3</sup>, Cr<sup>6+</sup> = 3.50740 Å<sup>3</sup>)<sup>17</sup> and were used for the calculations herein. These polarisability values were assigned to the nuclear centers of all atoms of the respective MOMs to model explicit polarisation.

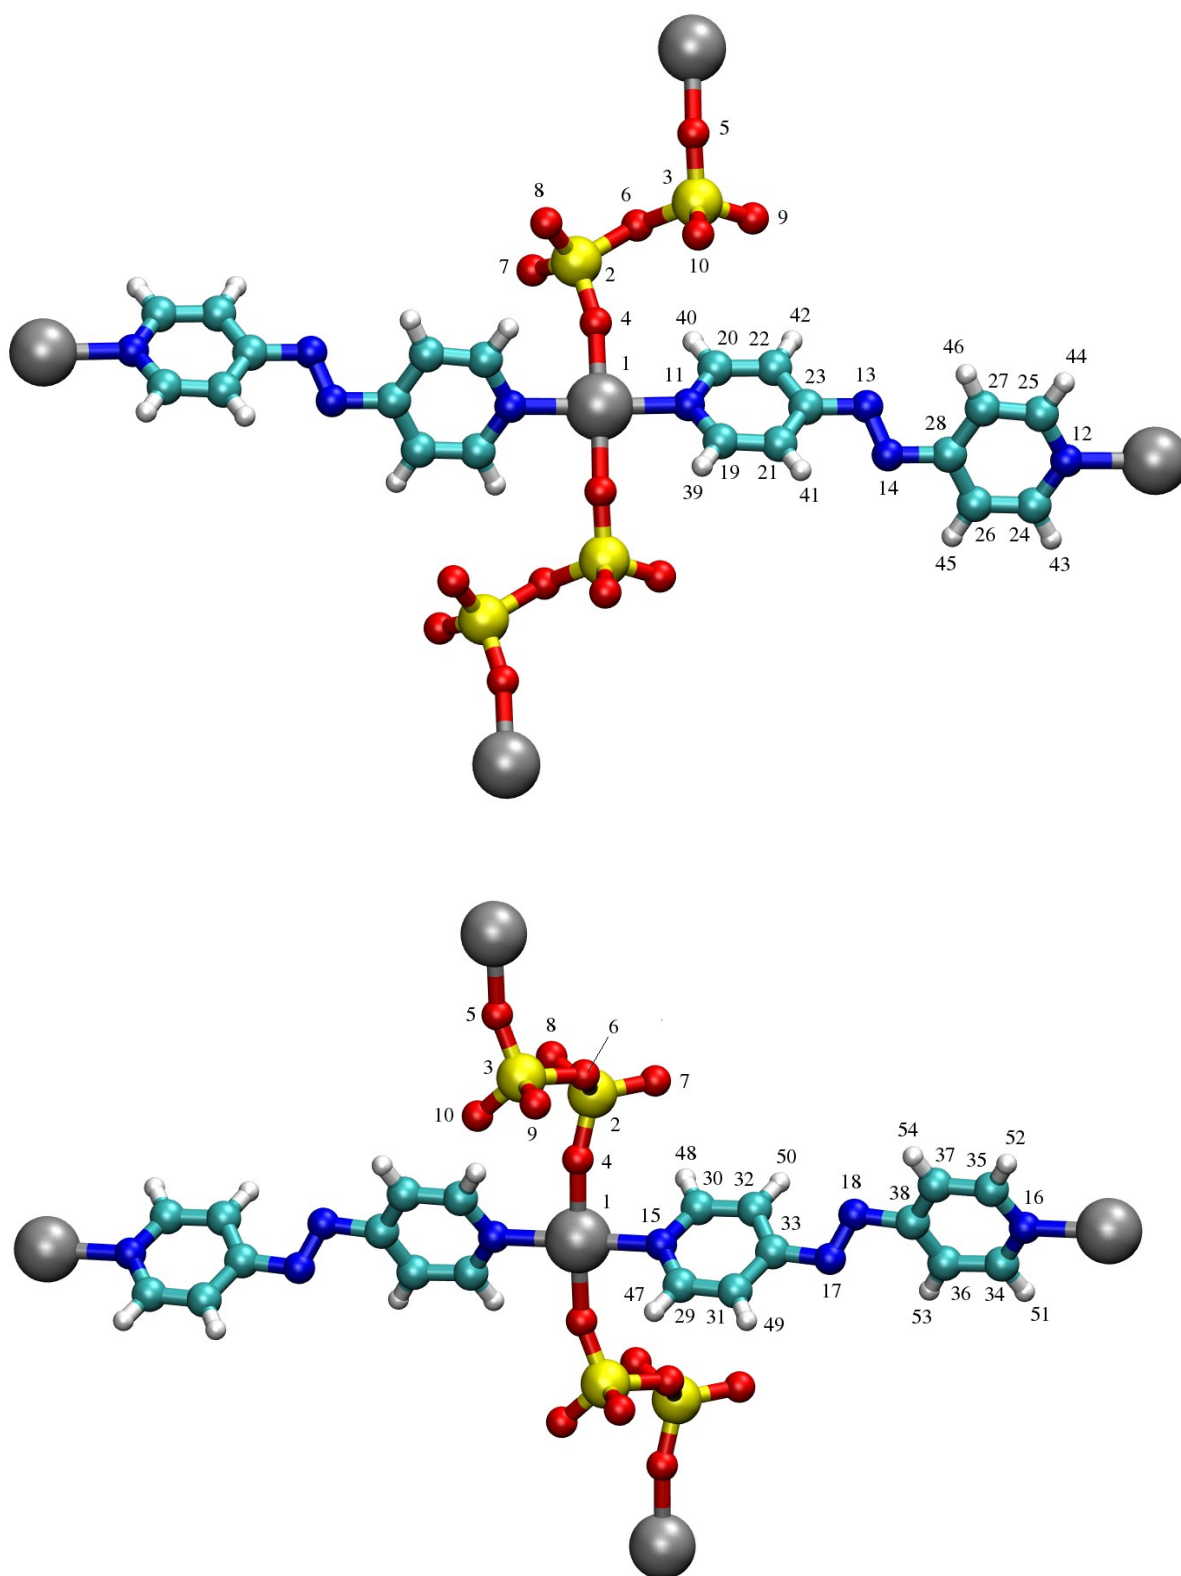

**Figure S25.** The chemically distinct atoms in **DICRO-3-M-i** (M = Co, Ni, Cu) defining the numbering system corresponding to **Table S7**. Atom colours: C = cyan, H = white, N = blue, O = red, Cr = yellow, Co/Ni/Cu = silver.

**Table S7.** The partial charges (in  $e^-$ ) for the chemically distinct atoms in **DICRO-3-M-i** (M = Co, Ni, Cu). Numerical labeling of atoms corresponds to **Figure S25**.

| Atom | Label | DICRO-3-Co-i | DICRO-3-Ni-i | DICRO-3-Cu-i |
|------|-------|--------------|--------------|--------------|
| M    | 1     | 1.09470      | 0.45880      | 0.75020      |
| Cr   | 2     | 1.35410      | 1.26160      | 1.29980      |
| Cr   | 3     | 1.39630      | 1.32250      | 1.25080      |
| O    | 4     | -0.79660     | -0.60790     | -0.72820     |
| O    | 5     | -0.77190     | -0.67220     | -0.72090     |
| O    | 6     | -0.68980     | -0.68950     | -0.67590     |
| O    | 7     | -0.61090     | -0.61290     | -0.63200     |
| O    | 8     | -0.56890     | -0.60480     | -0.62810     |
| O    | 9     | -0.61820     | -0.62360     | -0.60850     |
| O    | 10    | -0.60860     | -0.58830     | -0.62430     |
| N    | 11    | -0.38590     | -0.19990     | -0.19640     |
| N    | 12    | -0.38850     | -0.24260     | -0.22240     |
| N    | 13    | -0.23580     | -0.27560     | -0.23160     |
| N    | 14    | -0.22380     | -0.22460     | -0.25570     |
| N    | 15    | -0.46520     | -0.18100     | -0.31660     |
| N    | 16    | -0.48050     | -0.14120     | -0.30270     |
| N    | 17    | -0.21970     | -0.23340     | -0.24910     |
| N    | 18    | -0.10970     | -0.24930     | -0.24600     |
| C    | 19    | 0.20270      | 0.20940      | 0.20510      |
| C    | 20    | 0.32890      | 0.26700      | 0.33080      |
| C    | 21    | -0.43870     | -0.46010     | -0.47770     |
| C    | 22    | -0.58440     | -0.54510     | -0.52610     |
| C    | 23    | 0.57520      | 0.59850      | 0.60900      |
| C    | 24    | 0.32150      | 0.31860      | 0.38850      |
| C    | 25    | 0.16650      | 0.21170      | 0.26990      |
| C    | 26    | -0.49960     | -0.49240     | -0.58850     |
| C    | 27    | -0.43240     | -0.47020     | -0.48670     |
| C    | 28    | 0.60070      | 0.57120      | 0.63920      |
| C    | 29    | 0.31470      | 0.34520      | 0.30710      |
| C    | 30    | 0.29220      | 0.23790      | 0.24240      |
| C    | 31    | -0.51430     | -0.59650     | -0.52410     |
| C    | 32    | -0.45230     | -0.46670     | -0.49110     |
| C    | 33    | 0.61060      | 0.63030      | 0.58290      |
| C    | 34    | 0.25780      | 0.17790      | 0.27420      |
| C    | 35    | 0.35560      | 0.24400      | 0.42920      |
| C    | 36    | -0.39130     | -0.47780     | -0.56230     |
| C    | 37    | -0.49120     | -0.53650     | -0.72900     |
| C    | 38    | 0.59840      | 0.57990      | 0.73780      |
| H    | 39    | 0.13480      | 0.13420      | 0.12990      |
| H    | 40    | 0.11430      | 0.12790      | 0.14210      |
| H    | 41    | 0.20320      | 0.20220      | 0.19670      |
| H    | 42    | 0.22670      | 0.22290      | 0.21340      |
| H    | 43    | 0.12120      | 0.13190      | 0.11420      |

|   |    |         |         |         |
|---|----|---------|---------|---------|
| H | 44 | 0.11840 | 0.11740 | 0.10800 |
| H | 45 | 0.21420 | 0.20460 | 0.23190 |
| H | 46 | 0.18000 | 0.19290 | 0.17720 |
| H | 47 | 0.11670 | 0.12180 | 0.18460 |
| H | 48 | 0.12520 | 0.12950 | 0.12970 |
| H | 49 | 0.19360 | 0.20940 | 0.21100 |
| H | 50 | 0.17510 | 0.19080 | 0.20020 |
| H | 51 | 0.11950 | 0.14150 | 0.11520 |
| H | 52 | 0.09140 | 0.19710 | 0.10760 |
| H | 53 | 0.17540 | 0.21560 | 0.21500 |
| H | 54 | 0.19560 | 0.21790 | 0.23030 |

**Table S8.** The crystallographic distances (in Å) between various atoms in **DICRO-3-M-i** (M = Co, Ni, Cu). Label of atoms correspond to **Figure S25**.

| Atom Pair | DICRO-3-Co-i | DICRO-3-Ni-i | DICRO-3-Cu-i |
|-----------|--------------|--------------|--------------|
| 1–4       | 2.01190      | 2.03335      | 2.34152      |
| 1–5       | 2.02622      | 2.04606      | 2.27363      |
| 1–11      | 2.16194      | 2.10780      | 2.03679      |
| 1–12      | 2.15085      | 2.10078      | 2.04732      |
| 1–15      | 2.19547      | 2.06801      | 2.01949      |
| 1–16      | 2.14138      | 2.08725      | 2.01870      |
| 2–4       | 1.64393      | 1.63619      | 1.61538      |
| 2–6       | 1.76699      | 1.77795      | 1.78584      |
| 2–7       | 1.60283      | 1.59570      | 1.60048      |
| 2–8       | 1.56169      | 1.61131      | 1.60859      |
| 3–5       | 1.62676      | 1.62880      | 1.61760      |
| 3–6       | 1.77291      | 1.77751      | 1.78357      |
| 3–9       | 1.59720      | 1.58859      | 1.60226      |
| 3–10      | 1.59171      | 1.59196      | 1.62104      |
| 11–19     | 1.33839      | 1.34824      | 1.35208      |
| 11–20     | 1.34480      | 1.33685      | 1.33112      |
| 12–24     | 1.34603      | 1.34873      | 1.34139      |
| 12–25     | 1.34576      | 1.34718      | 1.35059      |
| 13–14     | 1.23579      | 1.24733      | 1.24764      |
| 13–23     | 1.41958      | 1.43394      | 1.43710      |
| 14–28     | 1.41618      | 1.43452      | 1.43870      |
| 15–29     | 1.32673      | 1.35283      | 1.34063      |
| 15–30     | 1.28155      | 1.33856      | 1.33759      |
| 16–34     | 1.36801      | 1.33698      | 1.33532      |
| 16–35     | 1.36449      | 1.34451      | 1.35185      |
| 17–18     | 1.19039      | 1.21886      | 1.22831      |
| 17–33     | 1.41242      | 1.43783      | 1.44612      |
| 18–38     | 1.42975      | 1.44698      | 1.43938      |
| 19–39     | 0.95001      | 0.94975      | 0.94954      |
| 20–40     | 0.94906      | 0.95063      | 0.94945      |



|       |         |         |         |
|-------|---------|---------|---------|
| 21–23 | 1.39589 | 1.38342 | 1.38258 |
| 21–41 | 0.95038 | 0.94934 | 0.94974 |
| 22–23 | 1.40449 | 1.37394 | 1.39335 |
| 22–42 | 0.95152 | 0.94962 | 0.95068 |
| 24–43 | 0.94996 | 0.94979 | 0.95042 |
| 25–44 | 0.95007 | 0.95103 | 0.94997 |
| 26–28 | 1.38933 | 1.38139 | 1.38723 |
| 26–45 | 0.95029 | 0.95069 | 0.94966 |
| 27–28 | 1.40650 | 1.39212 | 1.39052 |
| 27–46 | 0.94925 | 0.95016 | 0.94978 |
| 29–47 | 0.95249 | 0.94917 | 0.95004 |
| 30–48 | 0.94989 | 0.94925 | 0.95032 |
| 31–33 | 1.38578 | 1.38644 | 1.37550 |
| 31–49 | 0.95201 | 0.94970 | 0.95022 |
| 32–33 | 1.33804 | 1.39420 | 1.39220 |
| 32–50 | 0.95090 | 0.95130 | 0.94997 |
| 34–51 | 0.95000 | 0.94961 | 0.94983 |
| 35–52 | 0.95020 | 0.94975 | 0.94977 |
| 36–38 | 1.38999 | 1.37253 | 1.38850 |
| 36–53 | 0.94987 | 0.94942 | 0.94856 |
| 37–38 | 1.37129 | 1.35680 | 1.38399 |
| 37–54 | 0.94991 | 0.95057 | 0.94997 |

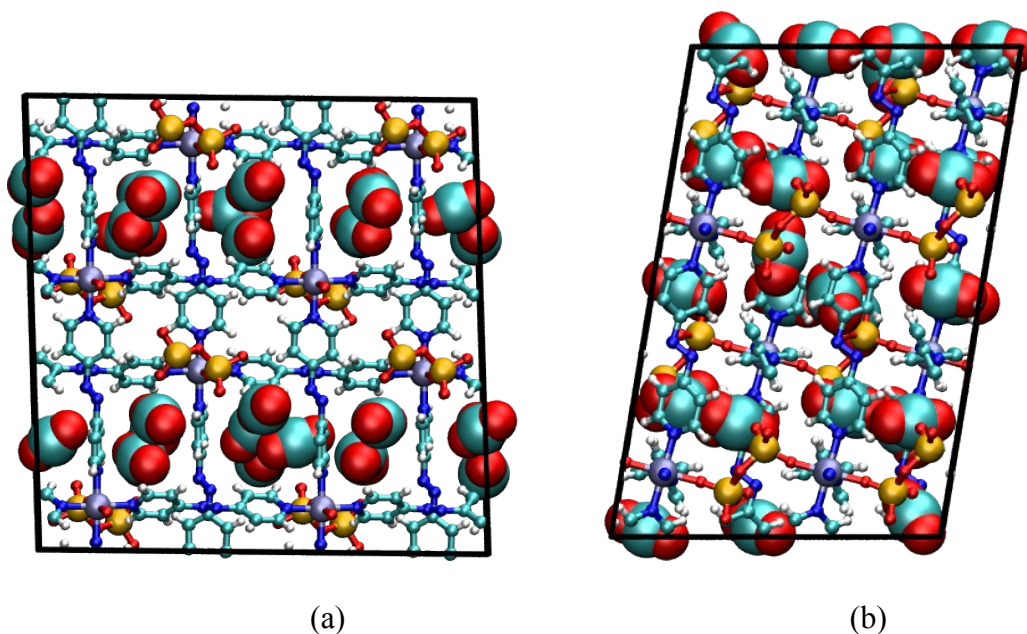

**Figure S26.** The *a*-axis view and (b) shifted *c*-axis view of the modeled  $2 \times 2 \times 2$  system cell of **DICRO-3-Ni-i** at CO<sub>2</sub> saturation. Atom colors: C = cyan, H = white, N = blue, O = red, Cr = yellow, Ni = lavender.

## Stability testing of DICRO-3-Ni-i

**Accelerated Stability Protocol.** The accelerated stability test was conducted by exposing the samples to 40 °C and 75% relative humidity for a stipulated amount of time in a desiccator. 75% relative humidity was achieved by using a supersaturated aqueous solution of sodium chloride (NaCl) maintained at 40 °C by placing the solution in an enclosed desiccator, which was subsequently placed in an oven held at 40 °C. The time frame used for our studies was 1 day, 7 days and 16 days. Once the sample was subjected to the desired amount of time, it was removed the desiccator and characterised in order to detect if the sample had been affected by exposure to humidity. Characterisation included PXRD, TGA and surface area measurements. For the surface area measurements, the samples were activated under the same degas conditions (same temperature; duration of heating under vacuum) as those used for the pristine compound (see sample preparation sections above).

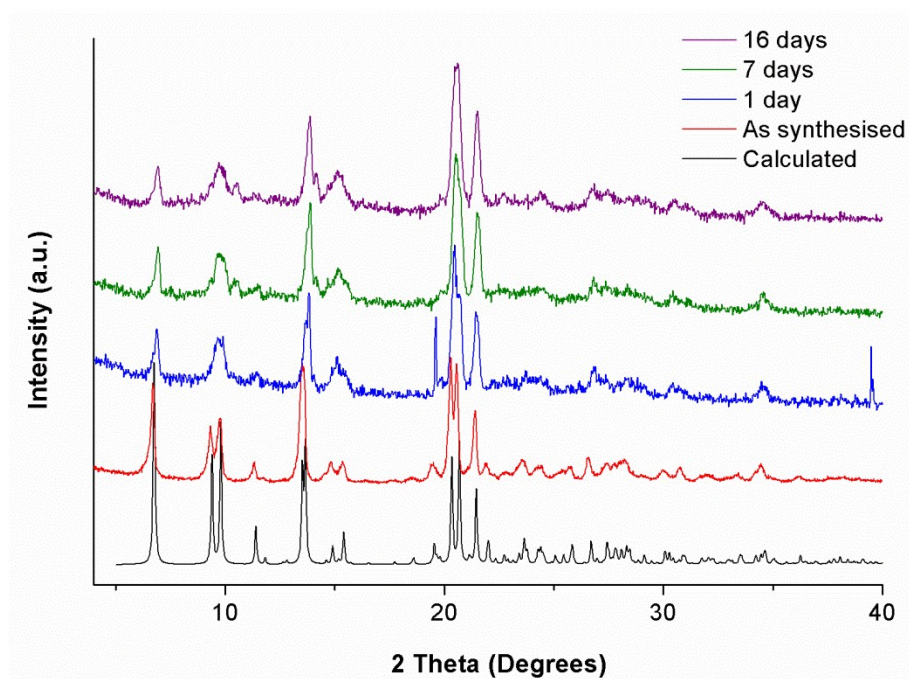

**Figure S27.** PXRD plots of **DICRO-3-Ni-i** following accelerated stability testing.

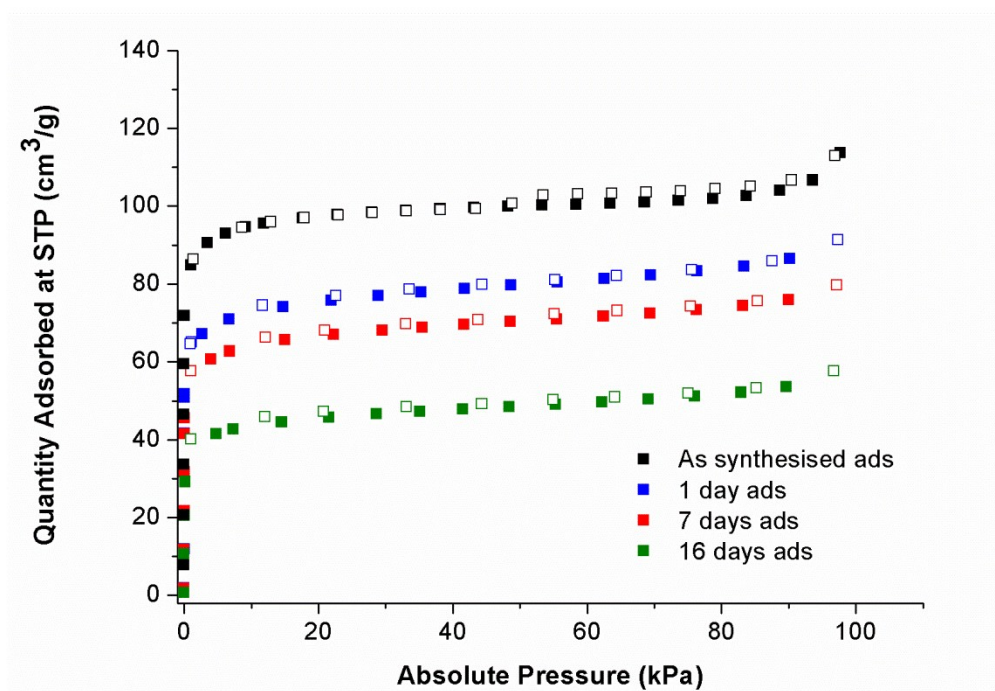

**Figure S28.** Single component CO<sub>2</sub> isotherms at 293 K of **DICRO-3-Ni-i** following accelerated stability testing.

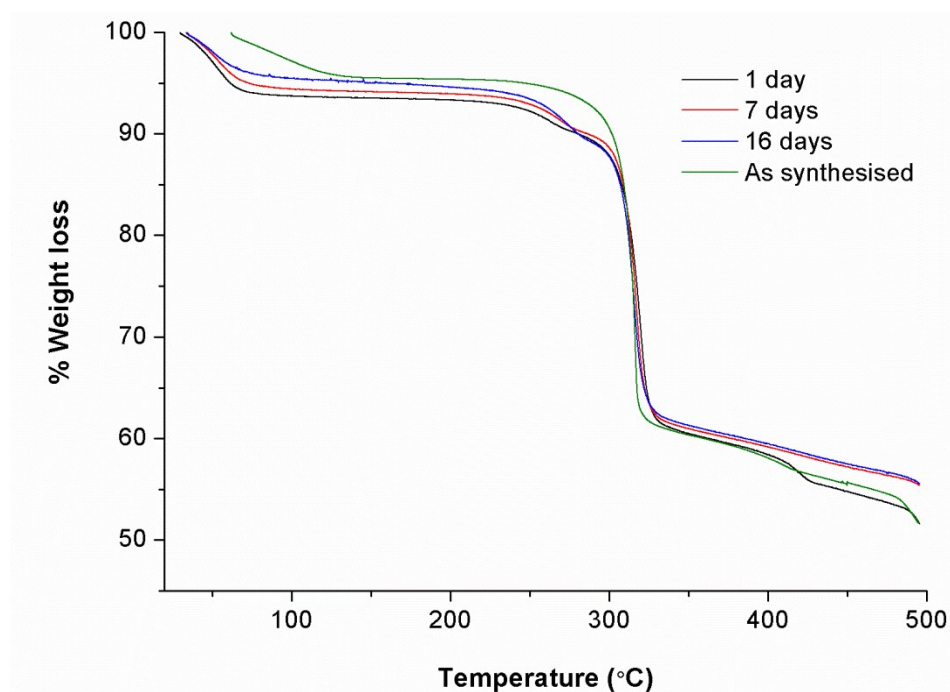

**Figure S29.** TGA plots of **DICRO-3-Ni-i** following accelerated stability testing.

### TGA-Temperature-Programmed Desorption (TPD) of **DICRO-3-Ni-i**

TGA-TPD studies were carried out on a gas mixing rig coupled independently with a TGA instrument TA Q50 V20.13 Build 39 and mass spectrometer (MS) Agilent 5975 MSD, see Fig. S30. In a typical TGA uptake test the given sample was activated by heating to a desired temperature under a 60 mL/min flow of nitrogen gas. This was then cooled to 30 °C before the chosen gas mixture was introduced to the sample. A mass flow controller was used to control the gas ratios for each test while moisture was introduced by passing the pre-mixed gas through a gas bubbler containing water. The weight increase for each solid was monitored until the weight began to plateau. The exposure time and gas flow conditions were then noted and subsequently applied to samples during TPD studies to analyse the composition of the adsorbed species during the desorption cycle.

TPD tests were carried out using a custom-made fixed-bed flow system. The system consists of a gas delivery system, a reactor housed in a furnace and a mass spectrometer detection system. There are two aims to this testing; to determine the CO<sub>2</sub> adsorbed by the sorbents; to examine the temperatures at which the CO<sub>2</sub> desorption occurs. Both of these parameters will be investigated using CO<sub>2</sub> TPD profiles. In a typical CO<sub>2</sub> TPD cycle, the sorbent is placed in a quartz tubular reactor. The sample is fixed in the reactor using quartz wool. Helium is then passed through the reactor at room temperature until a constant signal is observed using an Agilent 5975 MSD mass spectrometer (MS). The temperature is then increased at a rate of 10 °C/min to an appropriate temperature to remove impurities in the sample. The sample is then cooled to 30 °C. A gas mixture is then introduced to the sorbent for the required length of time. When the required adsorption parameters have been achieved, the gas flow is switched to nitrogen gas until the carbon dioxide concentrations are returned to background levels. The carrier gas is then switched to helium and heated to the required temperature at a rate of 10 °C/min in a flow of helium. The gas composition leaving the reactor is continuously monitored by MS for the identity and quantity of each component of the desorbed gas. Helium is used as a carrier gas as this is not detected by the MS, ensuring that all desorbed species from the adsorbents are detected.

During a direct air capture (DAC) test, a sample is activated under vacuum as per the conditions previously outlined. This sample is then exposed to the laboratory

environment for 24 h. The sample is then analysed using TPD studies to analyse the composition of the exhaust gas from the sorbent.

For calibration, a gas syringe (Valco precision sampling syringe, 2 mL, from Aldrich) was used to introduce pure CO<sub>2</sub>, taken directly from a gas cylinder, into the system. Known volumes of CO<sub>2</sub> gas, between 0.2 mL and 5 mL, were injected at a location before the reactor which contained several grams of adsorbent material. The gas flows were continuously monitored using the Agilent 5975 MS. The MS allowed the operator to monitor specific ions continuously throughout the run cycle as well as retrieve complete mass spectra of ions over 12 h for any given time during a test. The material adsorbed all the injected CO<sub>2</sub>. Helium gas was allowed to flow through the sample for a further 10 minutes to ensure all the injected CO<sub>2</sub> was adsorbed. If no CO<sub>2</sub> was detected by the MS, the sample was then heated to 200 °C at 10 °C/min while continuously monitoring the level of the desorbed CO<sub>2</sub>. The area of the subsequent CO<sub>2</sub> desorption peak was used as a measure of the known volume of injected CO<sub>2</sub>. This was repeated several times with different volumes of CO<sub>2</sub> gas. The peak areas associated with the different volumes of injected CO<sub>2</sub> were then used to determine the mass of CO<sub>2</sub> adsorbed in milligrams using the ideal gas law. The culmination of these injections was used to generate a calibration graph seen in Fig. S31. This graph was used to calculate the amount of CO<sub>2</sub> desorbed during a typical TPD run. The H<sub>2</sub>O uptake was determined from the overall weight loss/gain observed during gravimetric analysis.

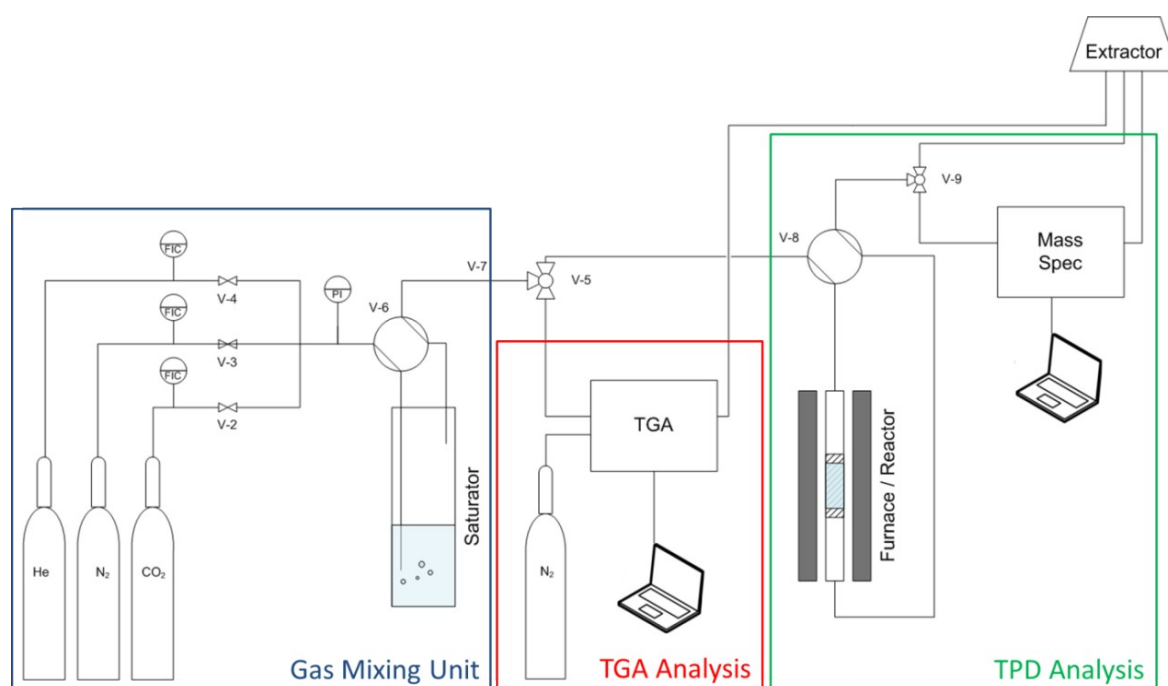

**Figure S30.** Schematic of gas mixing system, TGA uptake analysis and TPD analysis units.

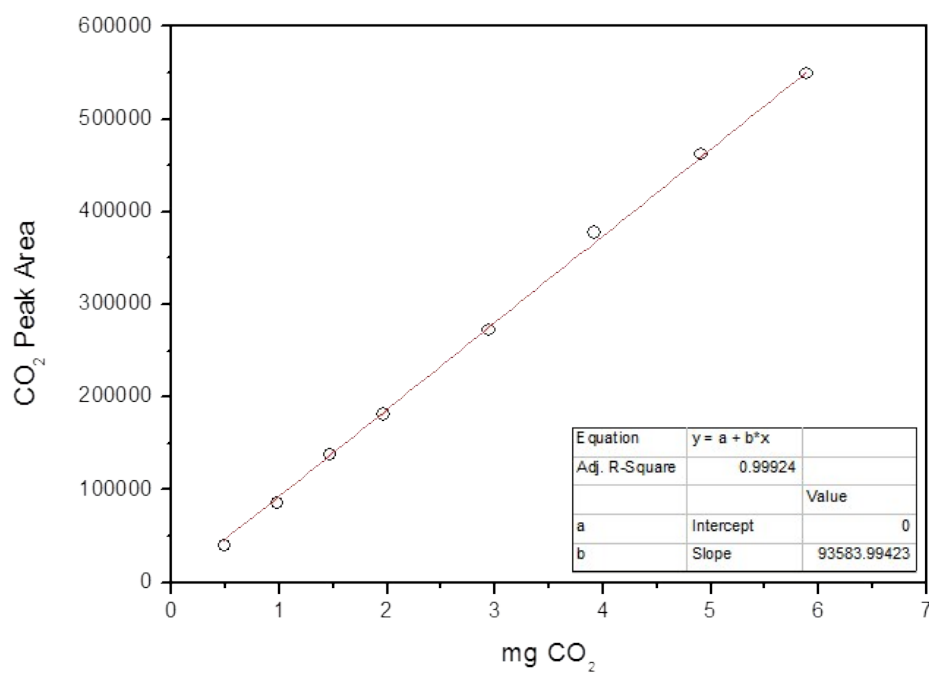

**Figure S31.** CO<sub>2</sub> calibration graph.

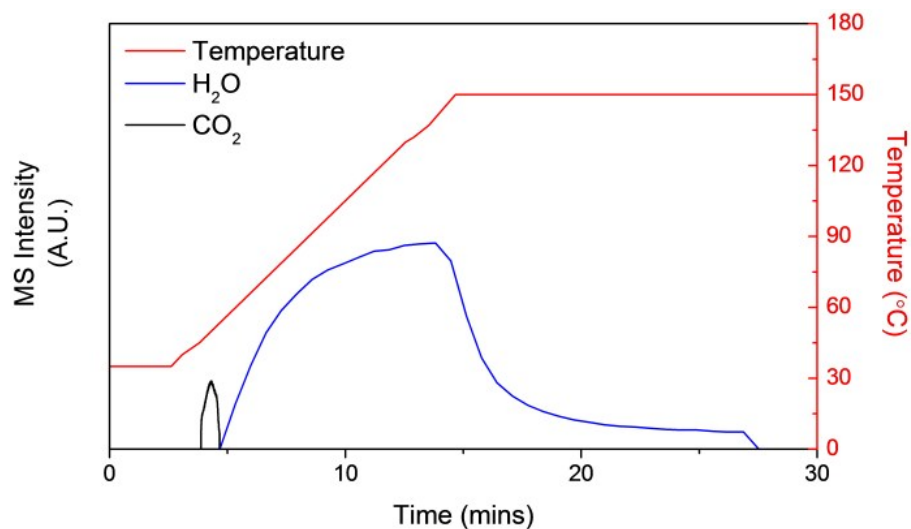

**Figure S32.** Temperature-Programmed Desorption (TPD) plots of Direct Air Capture (DAC) of CO<sub>2</sub> for **DICRO-3-Ni-i**.

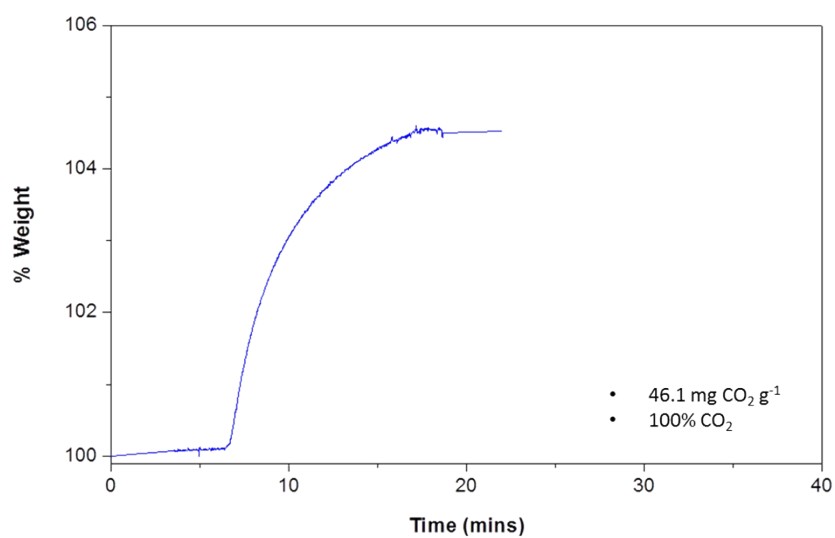

**Figure S33.** 1.0 atm dry CO<sub>2</sub> uptake, run 1 (35 °C). 46.1 mg CO<sub>2</sub>/g, 100 % CO<sub>2</sub>.

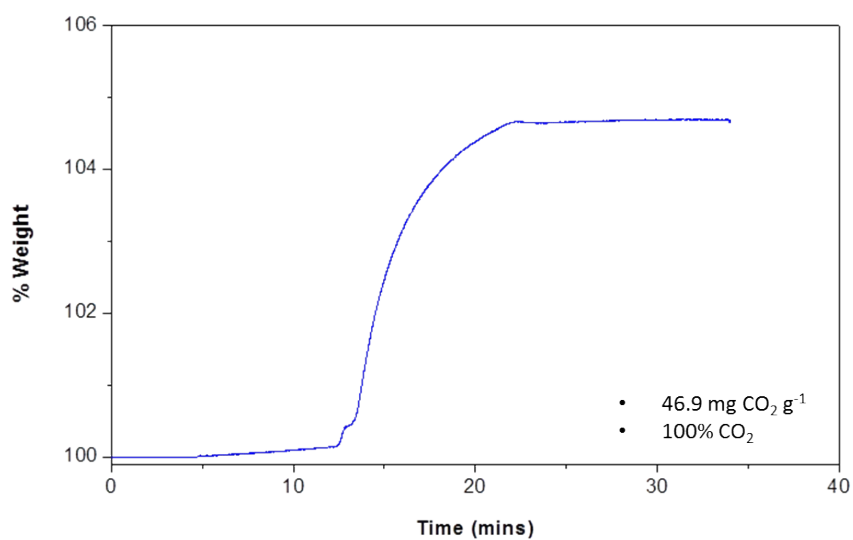

**Figure S34.** 1.0 atm dry CO<sub>2</sub> uptake, run 2 (+ 5 weeks, 35 °C). 46.9 mg CO<sub>2</sub>/g, 100 % CO<sub>2</sub>.

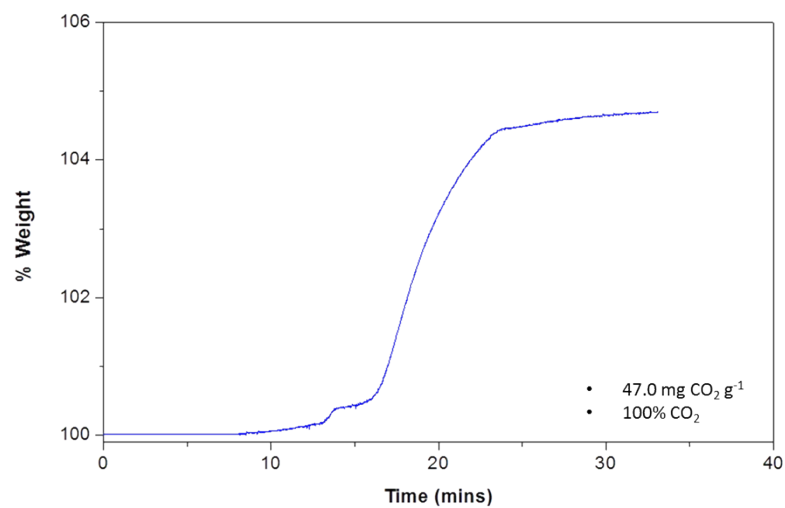

**Figure S35.** 1.0 atm dry CO<sub>2</sub> uptake, run 3 (+ 6 weeks, 35 °C). 47.0 mg CO<sub>2</sub>/g, 100 % CO<sub>2</sub>.

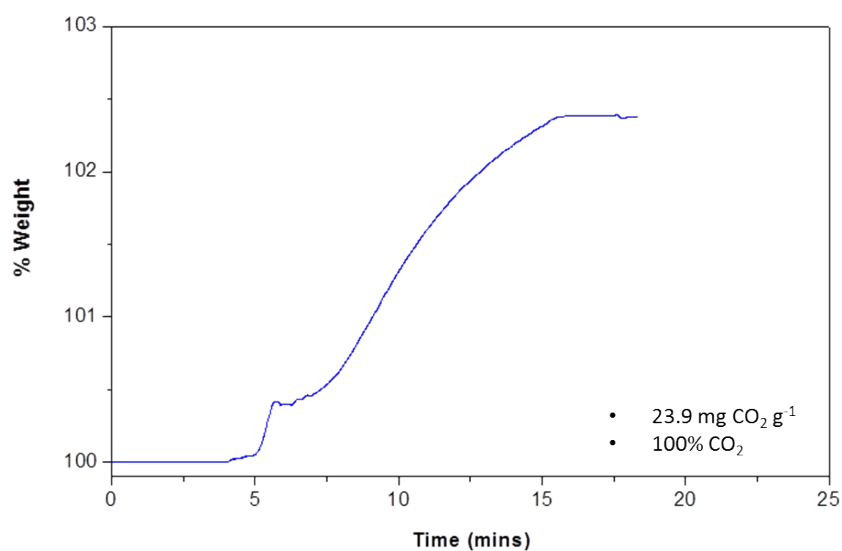

**Figure S36.** 0.15 atm dry CO<sub>2</sub> uptake. 23.9 mg CO<sub>2</sub>/g, 100 % CO<sub>2</sub>.

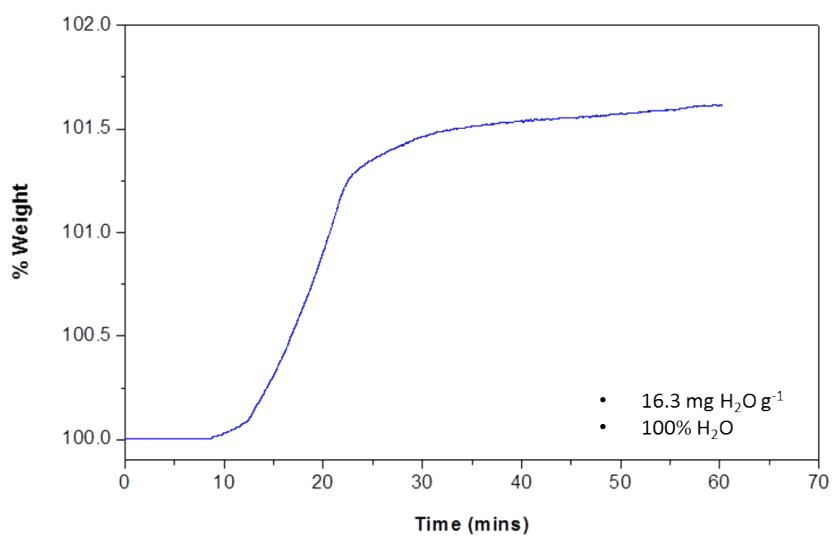

**Figure S37.** Moist 1.0 atm dry N<sub>2</sub> uptake. 16.3 mg H<sub>2</sub>O/g, 100 % H<sub>2</sub>O.



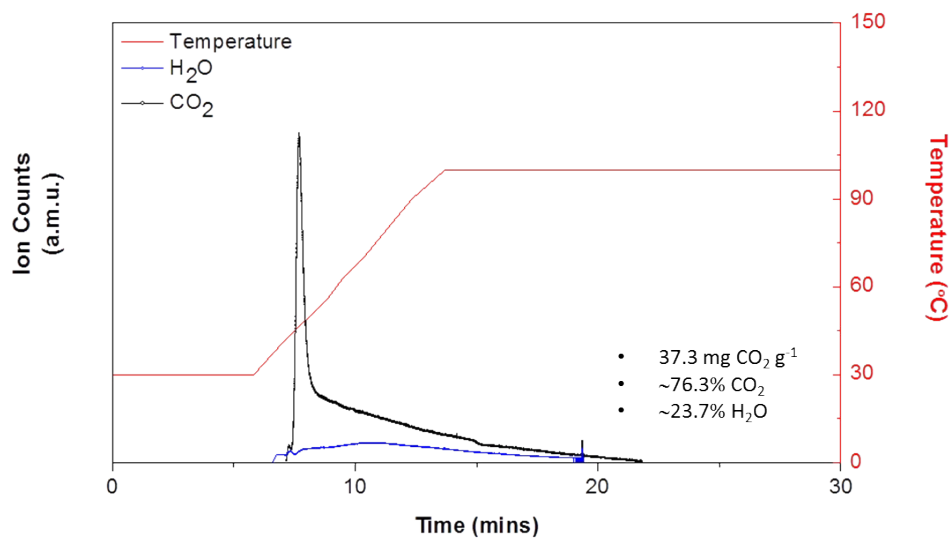

**Figure S38.** Moist 1.0 atm  $\text{CO}_2$  uptake. 37.3 mg  $\text{CO}_2$ /g, ~76.3%  $\text{CO}_2$ ; ~23.7%  $\text{H}_2\text{O}$ .

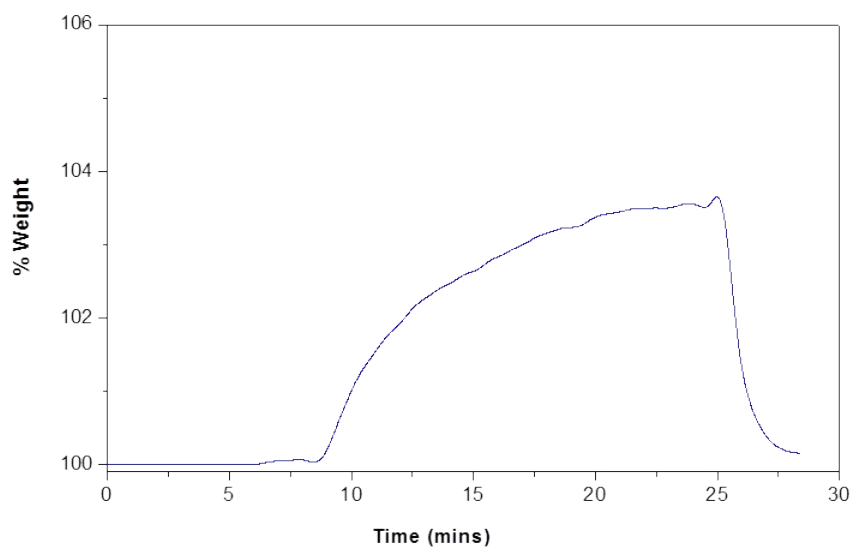

**Figure S39.** Moist 0.15 atm  $\text{CO}_2$ .

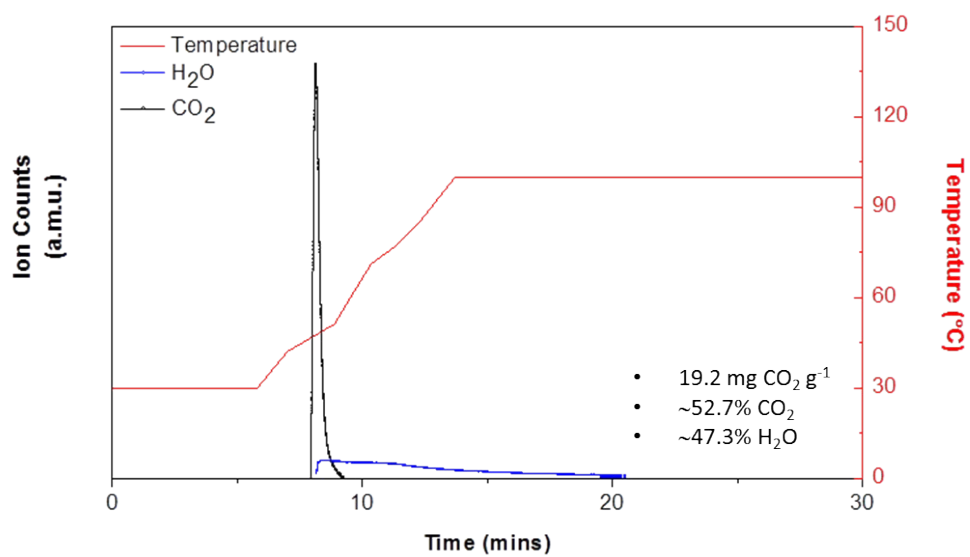

**Figure S40.** Moist 0.15 atm  $\text{CO}_2$ , TPD. 19.2 mg  $\text{CO}_2$ /g. ~52.7%  $\text{CO}_2$  ~47.3%  $\text{H}_2\text{O}$ .

**Table S9.** DAC and TPD uptakes for **DICRO-3-Ni-i**

| Sorbent             | DAC<br>(1 atm; 49% RH) |                  |                         | Moist CO <sub>2</sub> , (1 atm) |                  |                         | Moist CO <sub>2</sub> , (0.15 atm) |                  |                         | Moist N <sub>2</sub><br>(1 atm) | Dry CO <sub>2</sub> (1 atm) |                         | Dry CO <sub>2</sub> (0.15 atm) |                         |
|---------------------|------------------------|------------------|-------------------------|---------------------------------|------------------|-------------------------|------------------------------------|------------------|-------------------------|---------------------------------|-----------------------------|-------------------------|--------------------------------|-------------------------|
|                     | CO <sub>2</sub>        | H <sub>2</sub> O | CO <sub>2</sub><br>L/Kg | CO <sub>2</sub>                 | H <sub>2</sub> O | CO <sub>2</sub><br>L/Kg | CO <sub>2</sub>                    | H <sub>2</sub> O | CO <sub>2</sub><br>L/Kg | H <sub>2</sub> O                | CO <sub>2</sub>             | CO <sub>2</sub><br>L/Kg | CO <sub>2</sub>                | CO <sub>2</sub><br>L/Kg |
| <b>DICRO-3-Ni-i</b> | <12%<br>(1.9)          | >88%<br>(80)     | 0.97                    | >76%<br>(37.3)                  | <24%<br>(11.6)   | 18.9<br>9               | <53%<br>(19.2)                     | >47%<br>(17.2)   | 9.77                    | 100%<br>(16.3)                  | 100%<br>(47)                | 23.93                   | 100%<br>(23.9)                 | 12.17                   |

Values in parentheses below % value indicate mg CO<sub>2</sub> uptake per g sample.

## Dynamic Vapour Sorption (DVS)

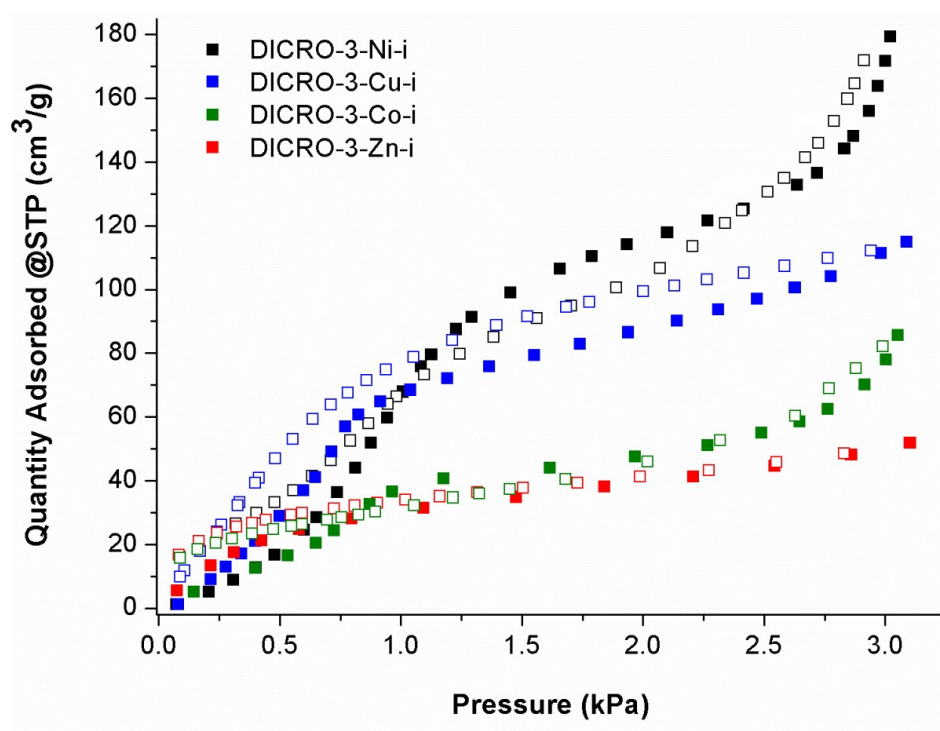

**Figure S41.** H<sub>2</sub>O adsorption isotherms measured at 298 K. Closed symbols = adsorption, open symbols = desorption.

## References:

1. Bruker SAINT+, Data Reduction Software, Bruker AXS Inc., Madison, Wisconsin, USA,
2. G. M. Sheldrick, *SADABS*, Program for area detector adsorption correction, Institute for Inorganic Chemistry, University of Göttingen, Germany, 1996
3. CrystalClear 1.4.0<sup>TM</sup> d\*TREK 9.7 software, Rigaku, Tokyo, Japan,
4. (a). G. M. Sheldrick, *SHELXL-97*, Program for refinement of crystal structures, University of Göttingen, Germany, 1997; (b). A. L. Spek, *Acta Crystallogr. Sect. A*, 1990, **46**, C34.
5. N. Metropolis, A. W. Rosenbluth, M. N. Rosenbluth and A. H. Teller, *J. Chem. Phys.*, 1953, **21**, 1087.
6. A. L. Mullen, T. Pham, K. Forrest, C. R. Cioce, K. McLaughlin and B. Space, *J. Chem. Theory Comput.*, 2013, **9**, 5421.
7. P. P. Ewald, *Ann. Phys.*, 1921, **369**, 253.
8. (a). J. Applequist, J. R. Carl and K.-K. Fung, *J. Am. Chem. Soc.*, 1972, **94**, 2952; (b). K. A. Bode and J. Applequist, *J. Phys. Chem.*, 1996, **100**, 17820; (c). K. McLaughlin, C. R. Cioce, T. Pham, J. L. Belof and B. Space, *J. Phys. Chem.*, 2013, **139**, 184112; (d). B. Thole, *Chem. Phys.*, 1981, **59**, 341.
9. D.-Y. Peng and D. B. Robinson, *Ind. Eng. Chem. Fundam.*, 1976, **15**, 59.
10. <https://github.com/mpmccode/mpmc>: J. L. Belof and B. Space, 2012.
11. W. L. Jorgensen, D. S. Maxwell and J. Tirado-Rivers, *J. Am. Chem. Soc.*, 1996, **118**, 11225.
12. A. K. Rappe, C. J. Casewit, K. S. Colwell, W. A. Goddard and W. M. Skiff, 1992, **114**, 10024.
13. (a). P. J. Hay and W. R. Wadt, *J. Chem. Phys.*, 1985, **82**, 270; (b). L. A. LaJohn, P. A. Christiansen, R. B. Ross, T. Atashroo and W. C. Ermler, *J. Chem. Phys.*, 1987, **87**, 2812; (c). W. J. Stevens, H. Basch and M. Krauss, *J. Chem. Phys.*, 1984, **81**, 6026.
14. M. Valiev, E. Bylaska, N. Govind, K. Kowalski, T. Straatsma, H. V. Dam, D. Wang, J. Nieplocha, E. Apra, T. Windus and W. de Jong, *Comput. Phys. Commun.*, 2010, **181**, 1477.
15. C. M. Breneman and K. B. Wiberg, *J. Comput. Chem.*, 1990, **11**, 361; L. E. Chirlian and M. M. Francl, *J. Comput. Chem.*, 1987, **8**, 894.
16. P. T. van Duijnen and M. Swart, *J. Phys. Chem. A*, 1998, **102**, 2399.
17. H. S. Scott, A. Bajpai, K. J. Chen, T. Pham, B. Space, J. J. Perry IV and M. Zaworotko, *Chem. Commun.*, 2015, **51**, 14832.
